# Supplementary material for: Nitrogen Enriched Solid-State Cultivation for the Overproduction of Azaphilone Red Pigments by Penicillium sclerotiorum SNB-CN111
Source: MDPI journal article supplement (doi:10.3390/jof9020156), 2023-01-24
Supplement: s1 [file s1]

Téo Hebra<sup>1</sup>, Véronique Eparvier<sup>1\*</sup>, David Touboul<sup>1,2\*</sup>

<sup>1</sup> Université Paris-Saclay, CNRS, Institut de Chimie des Substances Naturelles, UPR 2301, 91198, Gif-sur-Yvette, France.

<sup>2</sup> LCM, CNRS, Ecole polytechnique, Institut Polytechnique de Paris, Route de Saclay, 91120 Palaiseau, France.

|                                                                                                                                                                                                                                                                                                                     |    |
|---------------------------------------------------------------------------------------------------------------------------------------------------------------------------------------------------------------------------------------------------------------------------------------------------------------------|----|
| Figure S1: Spectral comparison with databases of cluster A annotated molecules with their theoretical protonated <i>m/z</i> .                                                                                                                                                                                       | 4  |
| Figure S2: Spectral comparison with databases of cluster B annotated molecules with their theoretical protonated <i>m/z</i> .                                                                                                                                                                                       | 5  |
| Figure S3: Spectral comparison of cluster C molecules with databases with their theoretical protonated <i>m/z</i> .                                                                                                                                                                                                 | 6  |
| Figure S4: Spectral comparison of cluster D molecules with databases and their theoretical protonated <i>m/z</i> .                                                                                                                                                                                                  | 8  |
| Figure S5: Spectral comparison of cluster E molecules with databases and their theoretical protonated <i>m/z</i> .                                                                                                                                                                                                  | 9  |
| Figure S6: Subdivision of Cluster D based on annotated features.                                                                                                                                                                                                                                                    | 12 |
| Figure S7: Annotation of cluster E with hypothetical chain structures integrated to the azaphilone scaffold, proposed from molecular network data and KEGG compound database [12]. epoxy means The 3,5-dimethyl-1,3-heptadienyl unit bear an epoxide on position 3. Cl means azaphilone is chlorinated              | 13 |
| Figure S8: HRMS spectrum for compound <b>24</b>                                                                                                                                                                                                                                                                     | 14 |
| Figure S9: <sup>1</sup> H NMR spectrum (CD <sub>3</sub> CN) of compound <b>24</b>                                                                                                                                                                                                                                   | 15 |
| Figure S10: <sup>13</sup> C NMR spectrum (CD <sub>3</sub> CN) of compound <b>24</b>                                                                                                                                                                                                                                 | 16 |
| Figure S11: HRMS spectrum for compound <b>39</b>                                                                                                                                                                                                                                                                    | 17 |
| Figure S12: <sup>1</sup> H NMR spectrum (CDCl <sub>3</sub> ) of compound <b>39</b>                                                                                                                                                                                                                                  | 18 |
| Figure S13: <sup>13</sup> C NMR spectrum (CDCl <sub>3</sub> ) of compound <b>39</b>                                                                                                                                                                                                                                 | 19 |
| Figure S14: HRMS spectrum for compound <b>50</b>                                                                                                                                                                                                                                                                    | 20 |
| Figure S15: <sup>1</sup> H NMR spectrum (MeOD) of compound <b>50</b>                                                                                                                                                                                                                                                | 21 |
| Figure S16: <sup>13</sup> C NMR spectrum (MeOD) of compound <b>50</b>                                                                                                                                                                                                                                               | 22 |
| Figure S17: Comparison of fragmentation spectra and retention time from hemisynthetized standards with metabolites <b>24</b> , <b>39</b> and <b>50</b> produced by <i>P. sclerotiorum</i> SNB-CN111.                                                                                                                | 23 |
| Figure S18: Extracted chromatogram for molecules <b>1</b> ([M+H] <sup>+</sup> , <i>m/z</i> 391.1307), <b>3</b> ([M+H] <sup>+</sup> , <i>m/z</i> 390.1467) and <b>4</b> ([M+H] <sup>+</sup> , <i>m/z</i> 434.1729) as a function of the concentration of ammonium acetate or ethanolamine added to solid CZK medium. | 25 |
| Figure S19: Metabolic profile of from <i>P. sclerotiorum</i> SNB-CN111 fermentation on solid CZK crude extract and two step fermentation process on porous cellophane membrane on solid CZK supplemented with propargilamine 0.5 g.L <sup>-1</sup> .                                                                | 26 |
| Figure S20: Base pic chromatogram of fraction F1 from flash chromatography of pulled two step fermentation process on porous cellophane membrane on solid CZK supplemented with propargilamine crude extracts.                                                                                                      | 27 |
| Figure S21 HRMS of compound <b>63</b> .                                                                                                                                                                                                                                                                             | 27 |
| Figure S22: <sup>1</sup> H NMR spectrum (CDCl <sub>3</sub> ) of compound <b>63</b> .                                                                                                                                                                                                                                | 28 |
| Figure S23: <sup>13</sup> C NMR spectrum (CDCl <sub>3</sub> ) of compound <b>63</b> .                                                                                                                                                                                                                               | 29 |
| Figure S24: COSY NMR spectrum (CDCl <sub>3</sub> ) of compound <b>63</b> .                                                                                                                                                                                                                                          | 30 |
| Figure S25: HSQC NMR spectrum (CDCl <sub>3</sub> ) of compound <b>63</b> .                                                                                                                                                                                                                                          | 31 |
| Figure S26 HMBC NMR spectrum (CDCl <sub>3</sub> ) of compound <b>63</b> .                                                                                                                                                                                                                                           | 32 |
| Figure S27: Key <sup>1</sup> H- <sup>1</sup> H COSY (bold bonds) and <sup>1</sup> H- <sup>13</sup> C (plain arrow) correlations of compound <b>63</b> .                                                                                                                                                             | 33 |
| Table S1: Cluster A features annotated by MS/MS database query. In-house database was built upon annotations from Hebra et al. <sup>1</sup> .                                                                                                                                                                       | 3  |
| Table S2: Cluster B features annotated by MS/MS database query. In-house database was built upon annotations from Hebra et al. <sup>1</sup> .                                                                                                                                                                       | 5  |
| Table S3: Cluster C features annotated by MS/MS database query. In-house database was built upon annotations from Hebra et al. <sup>1</sup> .                                                                                                                                                                       | 6  |

|                                                                                                                                                                                                                                                                                                                                                   |    |
|---------------------------------------------------------------------------------------------------------------------------------------------------------------------------------------------------------------------------------------------------------------------------------------------------------------------------------------------------|----|
| Table S4 : Cluster D features annotated by MS/MS database query. In-house database was built upon annotations from Hebra et al. <sup>1</sup> .....                                                                                                                                                                                                | 7  |
| Table S5: Cluster E features annotated by MS/MS database query. In-house database was built upon annotations from Hebra et al. <sup>1</sup> .....                                                                                                                                                                                                 | 9  |
| Table S6: Annotation of azaphilones from cluster D-I with proposed chain structure from molecular network data and KEGG compound database. <sup>12</sup> .....                                                                                                                                                                                    | 10 |
| Table S7: Annotation of azaphilones from cluster D-II with proposed chain structure from molecular network data and KEGG compound database. <sup>12</sup> .....                                                                                                                                                                                   | 11 |
| Table S8: Annotation of azaphilones from cluster D-III with proposed chain structure from molecular network data and KEGG compound database. <sup>12</sup> .....                                                                                                                                                                                  | 11 |
| Table S9: Annotation of azaphilones from cluster E with proposed chain structure from molecular network data and KEGG compound database. <sup>12</sup> .....                                                                                                                                                                                      | 12 |
| Table S10: Absorbance at 500, 460 and 400 nm of <i>P. sclerotiorum</i> SNB-CN111 crude extracts from fermentation on solid CZK, PD and YE. Values are given in AU.g <sup>-1</sup> of culture medium. ....                                                                                                                                         | 23 |
| Table S11: Absorbance at 500, 460 and 400 nm of <i>P. sclerotiorum</i> SNB-CN111 crude extracts from fermentation on solid CZK supplemented with ammonium acetate or ethanolamine at 0, 0.1, 0.5 and 2 g.L <sup>-1</sup> . Values are given in AU.g <sup>-1</sup> of culture medium.....                                                          | 24 |
| Table S12: Absorbance at 500, 460 and 400 nm of <i>P. sclerotiorum</i> SNB-CN111 crude extracts from two step fermentation process on porous cellophane membrane on solid CZK supplemented with ammonium acetate or ethanolamine at 0, 0.1, 0.5 and 2 g.L <sup>-1</sup> . Values are given in AU.g <sup>-1</sup> of culture medium. ....          | 25 |
| Table S13: Absorbance at 500, 460, and 400 nm of <i>P. sclerotiorum</i> SNB-CN111 crude extracts from two step fermentation process on porous cellophane membrane on solid CZK supplemented with propargilamine at 0, 0.1, 0.5 and 2 g.L <sup>-1</sup> . Values are given in AU.g <sup>-1</sup> of culture medium. ....                           | 25 |
| Table S14: <sup>1</sup> H NMR spectroscopic data for compounds <b>3</b> , <b>4</b> , <b>39'</b> and <b>63</b> recorded at 500 MHz on CDCl <sub>3</sub> , <b>24'</b> recorded at 500 MHz on CD <sub>3</sub> CN and <b>50'</b> recorded at 500 MHz on MeOD. Compounds <b>3</b> and <b>4</b> were described on a previous study. <sup>1</sup> .....  | 34 |
| Table S15: <sup>13</sup> C NMR spectroscopic data for compounds <b>3</b> , <b>4</b> , <b>39'</b> and <b>63</b> recorded at 500 MHz on CDCl <sub>3</sub> , <b>24'</b> recorded at 700 MHz on CD <sub>3</sub> CN and <b>50'</b> recorded at 500 MHz on MeOD. Compounds <b>3</b> and <b>4</b> were described on a previous study. <sup>1</sup> ..... | 35 |

Table S1: Cluster A features annotated by MS/MS database query. In-house database was built upon annotations from Hebra et al.<sup>1</sup>

| ClusterA           |             |                                                  |                     |          |              |            |       |                          |                   |
|--------------------|-------------|--------------------------------------------------|---------------------|----------|--------------|------------|-------|--------------------------|-------------------|
| [M+H] <sup>+</sup> | Error (ppm) | Formula                                          | Name                | Database | Cosine score | Annotation | Ref   | $\epsilon(\lambda_{nm})$ | Minimal condition |
| 357.1706           | -2.7        | C <sub>21</sub> H <sub>24</sub> O <sub>5</sub>   |                     | In-house | 0.97         | Level 2    | [1,2] |                          | CZK               |
| 359.1863           | -2.8        | C <sub>21</sub> H <sub>26</sub> O <sub>5</sub>   |                     | In-house | 0.72         | Level 3    | [1]   |                          | PD                |
| 363.1349           | -2.4        | C <sub>20</sub> H <sub>23</sub> ClO <sub>4</sub> |                     | In-house | 0.88         | Level 2    | [1]   |                          | CZK               |
| 371.1859           | -1.6        | C <sub>22</sub> H <sub>26</sub> O <sub>5</sub>   |                     | In-house | 0.85         | Level 2    | [1]   |                          | PD                |
| 385.2013           | -0.9        | C <sub>23</sub> H <sub>28</sub> O <sub>5</sub>   |                     | In-house | 0.86         | Level 3    | [1]   |                          | PD                |
| 391.1315           | -2.1        | C <sub>21</sub> H <sub>23</sub> ClO <sub>5</sub> | Sclerotiorin        | MS-Dial  | 0.84         | Level 1    | [3,4] | 12000(445)               | CZK               |
| 395.1633           | -3.4        | C <sub>21</sub> H <sub>27</sub> ClO <sub>5</sub> | Isochromophilone IV | MS-Dial  | 0.66         | Level 2    | [5]   | 39400(390)               | CZK               |
| 399.2177           | -2.8        | C <sub>24</sub> H <sub>30</sub> O <sub>5</sub>   |                     | In-house | 0.9          | Level 3    | [1]   |                          | PD                |
| 405.1473           | -2.4        | C <sub>22</sub> H <sub>25</sub> ClO <sub>5</sub> | Sclerketide B       | In-house | 0.95         | Level 2    | [6]   | 17(332)                  | PD                |
| 407.1261           | -1.3        | C <sub>21</sub> H <sub>23</sub> ClO <sub>6</sub> |                     | In-house | 0.73         | Level 3    | [1]   |                          | PD                |
| 419.163            | -2.4        | C <sub>23</sub> H <sub>27</sub> ClO <sub>5</sub> |                     | In-house | 0.93         | Level 3    | [1]   |                          | PD                |
| 433.1785           | -2.0        | C <sub>24</sub> H <sub>29</sub> ClO <sub>5</sub> |                     | In-house | 0.7          | Level 3    | [1]   |                          | PD                |
| 435.1578           | -2.1        | C <sub>23</sub> H <sub>27</sub> ClO <sub>6</sub> |                     | In-house | 0.63         | Level 3    | [1]   |                          | PD                |

Level 0 corresponds annotations from isolated pure compounds; level 1 to annotations by comparison with standards; level 2 to putative annotations (e.g., MS/MS library comparison or tentative structure); level 3 to a chemical class assignment

Figure 1 displays a comparison of experimental mass spectra (blue lines) with database reference spectra (red lines) for various chlorinated and substituted coumarins. The figure is organized into two columns, each showing a chemical structure, its  $m/z$  value, and corresponding mass spectra plots. The x-axis for all plots is  $m/z$ , ranging from 100 to 400. The y-axis represents relative intensity. The legend at the bottom indicates that red lines represent the Database and blue lines represent Experimental data.

**Left Column:**

- Structure 1:  $m/z$  357.1697
- Structure 2:  $m/z$  363.1358
- Structure 3:  $m/z$  385.2010
- Structure 4:  $m/z$  395.1620
- Structure 5:  $m/z$  405.1463
- Structure 6:  $m/z$  419.1620
- Structure 7:  $m/z$  435.1569

**Right Column:**

- Structure 1:  $m/z$  359.1853
- Structure 2:  $m/z$  371.1853
- Structure 3:  $m/z$  391.1307
- Structure 4:  $m/z$  399.2166
- Structure 5:  $m/z$  407.1256
- Structure 6:  $m/z$  433.1776

Legend: — Database (red line), — Experimental (blue line)

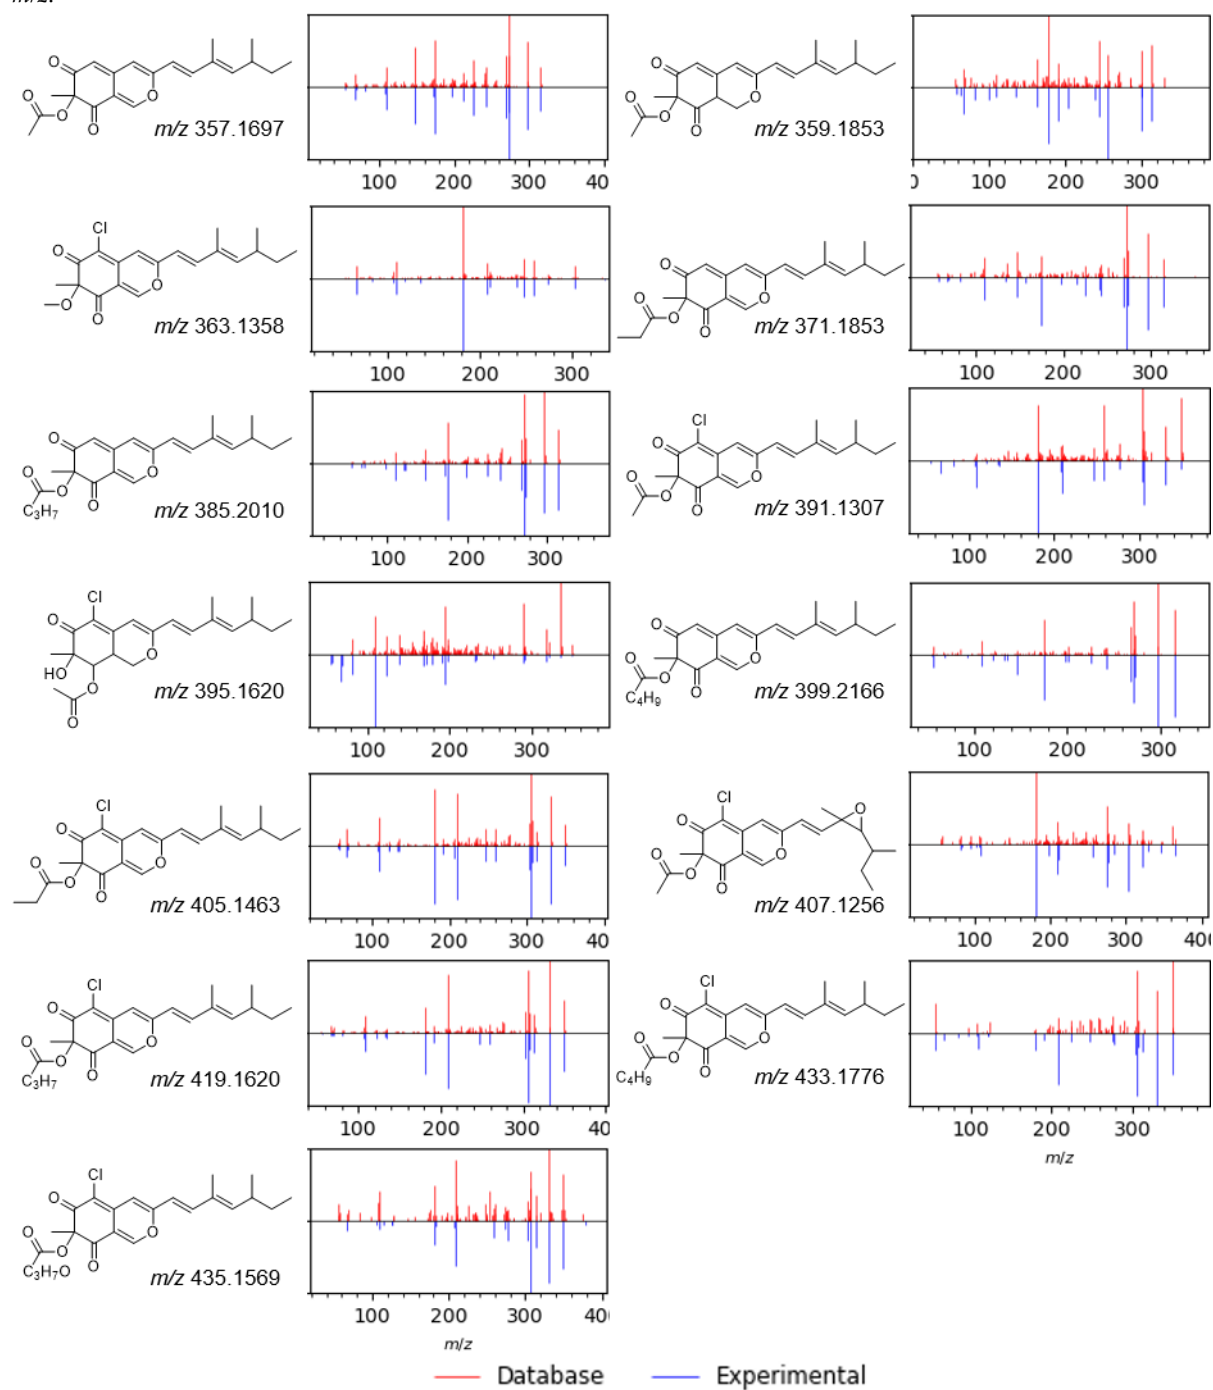

Table S2: Cluster B features annotated by MS/MS database query. In-house database was built upon annotations from Hebra et al.<sup>1</sup>

| ClusterB           |             |                                                  |                    |          |              |            |     |                          |                   |
|--------------------|-------------|--------------------------------------------------|--------------------|----------|--------------|------------|-----|--------------------------|-------------------|
| [M+H] <sup>+</sup> | Error (ppm) | Formula                                          | Name               | Database | Cosine score | Annotation | Ref | $\epsilon(\lambda_{nm})$ | Minimal condition |
| 383.1865           | -3.1        | C <sub>23</sub> H <sub>26</sub> O <sub>5</sub>   | Ochrephilone       | MS-Dial  | 0.8          | Level 2    | [7] | 22000(415)               | CZK               |
| 399.1805           | -0.7        | C <sub>23</sub> H <sub>26</sub> O <sub>6</sub>   |                    | In-house | 0.9          | Level 3    | [1] |                          | CZK               |
| 417.1471           | -1.9        | C <sub>23</sub> H <sub>25</sub> ClO <sub>5</sub> | Isochromophilone I | GNPS     | 0.71         | Level 2    | [8] | 15700(412)               | CZK               |

Level 0 corresponds annotations from isolated pure compounds; level 1 to annotations by comparison with standards; level 2 to putative annotations (e.g., MS/MS library comparison or tentative structure); level 3 to a chemical class assignment

Figure S2: Spectral comparison with databases of cluster B annotated molecules with their theoretical protonated *m/z*.

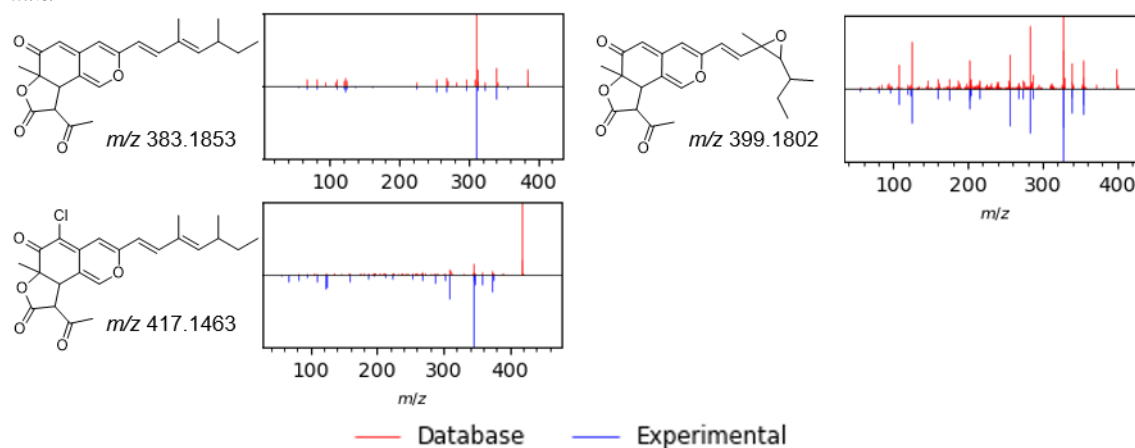

Table S3: Cluster C features annotated by MS/MS database query. In-house database was built upon annotations from Hebra et al.<sup>1</sup>

| ClusterC           |             |                                                   |                 |          |              |            |       |                          |                   |
|--------------------|-------------|---------------------------------------------------|-----------------|----------|--------------|------------|-------|--------------------------|-------------------|
| [M+H] <sup>+</sup> | Error (ppm) | Formula                                           | Name            | Database | Cosine score | Annotation | Ref   | $\epsilon(\lambda_{nm})$ | Minimal condition |
| 356.1859           | -0.8        | C <sub>21</sub> H <sub>25</sub> NO <sub>4</sub>   |                 | In-house | 0.94         | Level 2    | [1]   |                          | PD                |
| 362.1527           | -2.6        | C <sub>20</sub> H <sub>24</sub> ClNO <sub>3</sub> |                 | In-house | 0.94         | Level 2    | [1]   |                          | YE                |
| 390.1469           | -0.6        | C <sub>21</sub> H <sub>24</sub> ClNO <sub>4</sub> | Sclerotioramine | MONA     | 0.94         | Level 1    | [1,9] | 20 000(331)              | PD                |
| 404.1626           | -0.7        | C <sub>22</sub> H <sub>26</sub> ClNO <sub>4</sub> |                 | In-house | 0.99         | Level 2    | [1]   |                          | PD                |
| 406.1420           | -1.0        | C <sub>21</sub> H <sub>24</sub> ClNO <sub>5</sub> |                 | In-house | 0.95         | Level 3    | [1]   |                          | YE                |
| 418.1786           | -1.5        | C <sub>23</sub> H <sub>28</sub> ClNO <sub>4</sub> |                 | In-house | 0.97         | Level 3    | [1]   |                          | YE                |
| 432.1946           | -2.3        | C <sub>24</sub> H <sub>30</sub> ClNO <sub>4</sub> |                 | In-house | 0.93         | Level 3    | [1]   |                          | PD                |
| 434.1739           | -2.4        | C <sub>23</sub> H <sub>28</sub> ClNO <sub>5</sub> |                 | In-house | 0.91         | Level 3    | [1]   |                          | PD                |

Level 0 corresponds annotations from isolated pure compounds; level 1 to annotations by comparison with standards; level 2 to putative annotations (e.g., MS/MS library comparison or tentative structure); level 3 to a chemical class assignment

Figure S3: Spectral comparison of cluster C molecules with databases with their theoretical protonated  $m/z$ .

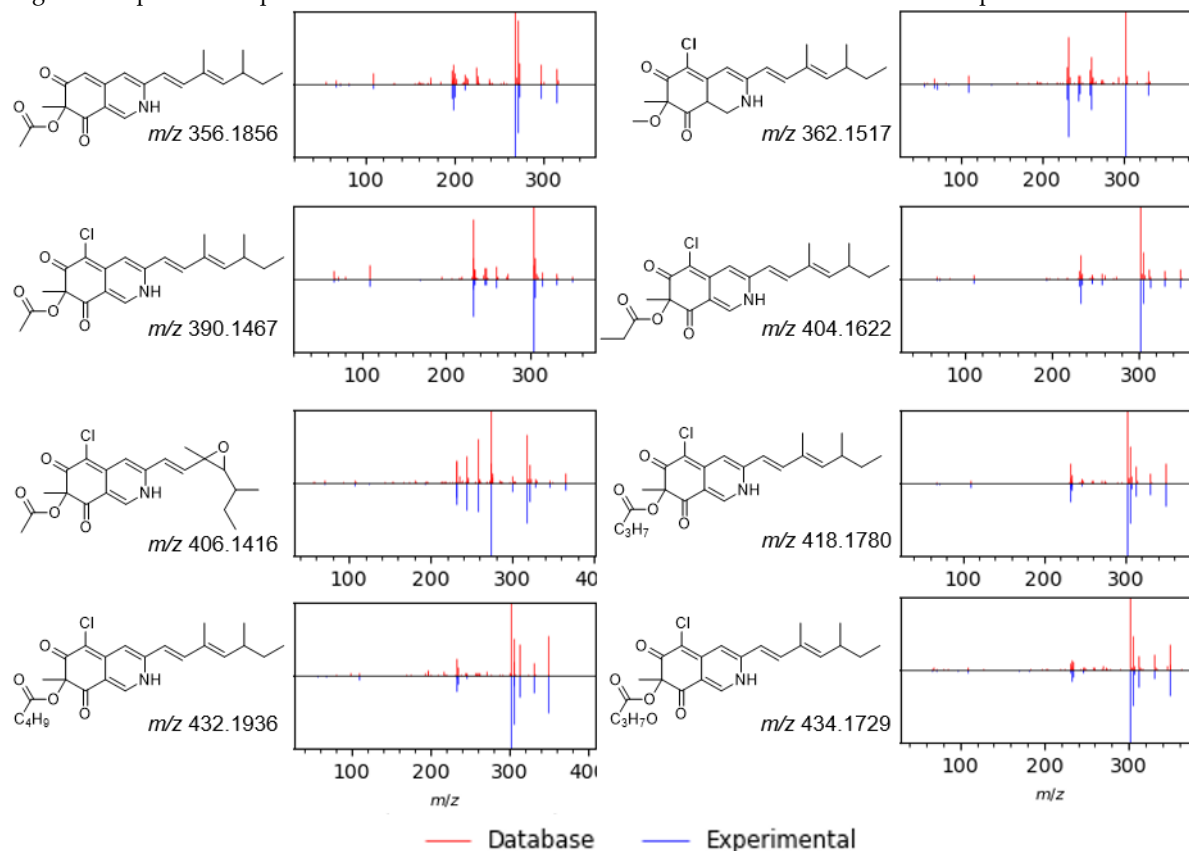

Table S4 : Cluster D features annotated by MS/MS database query. In-house database was built upon annotations from Hebra et al.<sup>1</sup>

| ClusterD           |             |                                                                 |                     |          |              |            |      |                          |                   |
|--------------------|-------------|-----------------------------------------------------------------|---------------------|----------|--------------|------------|------|--------------------------|-------------------|
| [M+H] <sup>+</sup> | Error (ppm) | Formula                                                         | Name                | Database | Cosine score | Annotation | Ref  | $\epsilon(\lambda_{nm})$ | Minimal condition |
| 400.2138           | -4.9        | C <sub>23</sub> H <sub>29</sub> NO <sub>5</sub>                 |                     | In-house | 0.81         | Level 2    | [1]  |                          | PD                |
| 434.1732           | -0.8        | C <sub>23</sub> H <sub>28</sub> ClNO <sub>5</sub>               | Isochromophilone VI | MS-Dial  | 0.83         | Level 1    | [5]  | 23400(370)               | CZK               |
| 448.1526           | -1.0        | C <sub>23</sub> H <sub>26</sub> ClNO <sub>6</sub>               |                     | In-house | 0.88         | level 2    | [1]  |                          | YE                |
| 448.1903           | -4.0        | C <sub>24</sub> H <sub>30</sub> ClNO <sub>5</sub>               |                     | In-house | 0.91         | Level 2    | [1]  |                          | YE                |
| 460.1530           | -1.9        | C <sub>24</sub> H <sub>26</sub> ClNO <sub>6</sub>               |                     | In-house | 0.87         | Level 3    | [1]  |                          | PD                |
| 476.1840           | -1.2        | C <sub>25</sub> H <sub>30</sub> ClNO <sub>6</sub>               | Isochromophilone IX | MONA     | 0.88         | Level 2    | [10] | No data                  | YE                |
| 478.1617           | 2.1         | C <sub>24</sub> H <sub>28</sub> ClNO <sub>7</sub>               |                     | In-house | 0.9          | Level 3    | [1]  |                          | YE                |
| 490.1997           | -1.2        | C <sub>26</sub> H <sub>32</sub> ClNO <sub>6</sub>               |                     | In-house | 0.91         | Level 3    | [1]  |                          | YE                |
| 505.1737           | -0.2        | C <sub>25</sub> H <sub>29</sub> ClN <sub>2</sub> O <sub>7</sub> |                     | In-house | 0.93         | Level 3    | [1]  |                          | PD                |
| 519.1902           | -1.8        | C <sub>26</sub> H <sub>31</sub> ClN <sub>2</sub> O <sub>7</sub> |                     | In-house | 0.94         | Level 3    | [1]  |                          | YE                |
| 520.1735           | -0.5        | C <sub>26</sub> H <sub>30</sub> ClNO <sub>8</sub>               |                     | In house | 0.83         | Level 3    | [1]  |                          | PD                |

Level 0 corresponds annotations from isolated pure compounds; level 1 to annotations by comparison with standards; level 2 to putative annotations (e.g., MS/MS library comparison or tentative structure); level 3 to a chemical class assignment

Figure S4: Spectral comparison of cluster D molecules with databases and their theoretical protonated  $m/z$ .

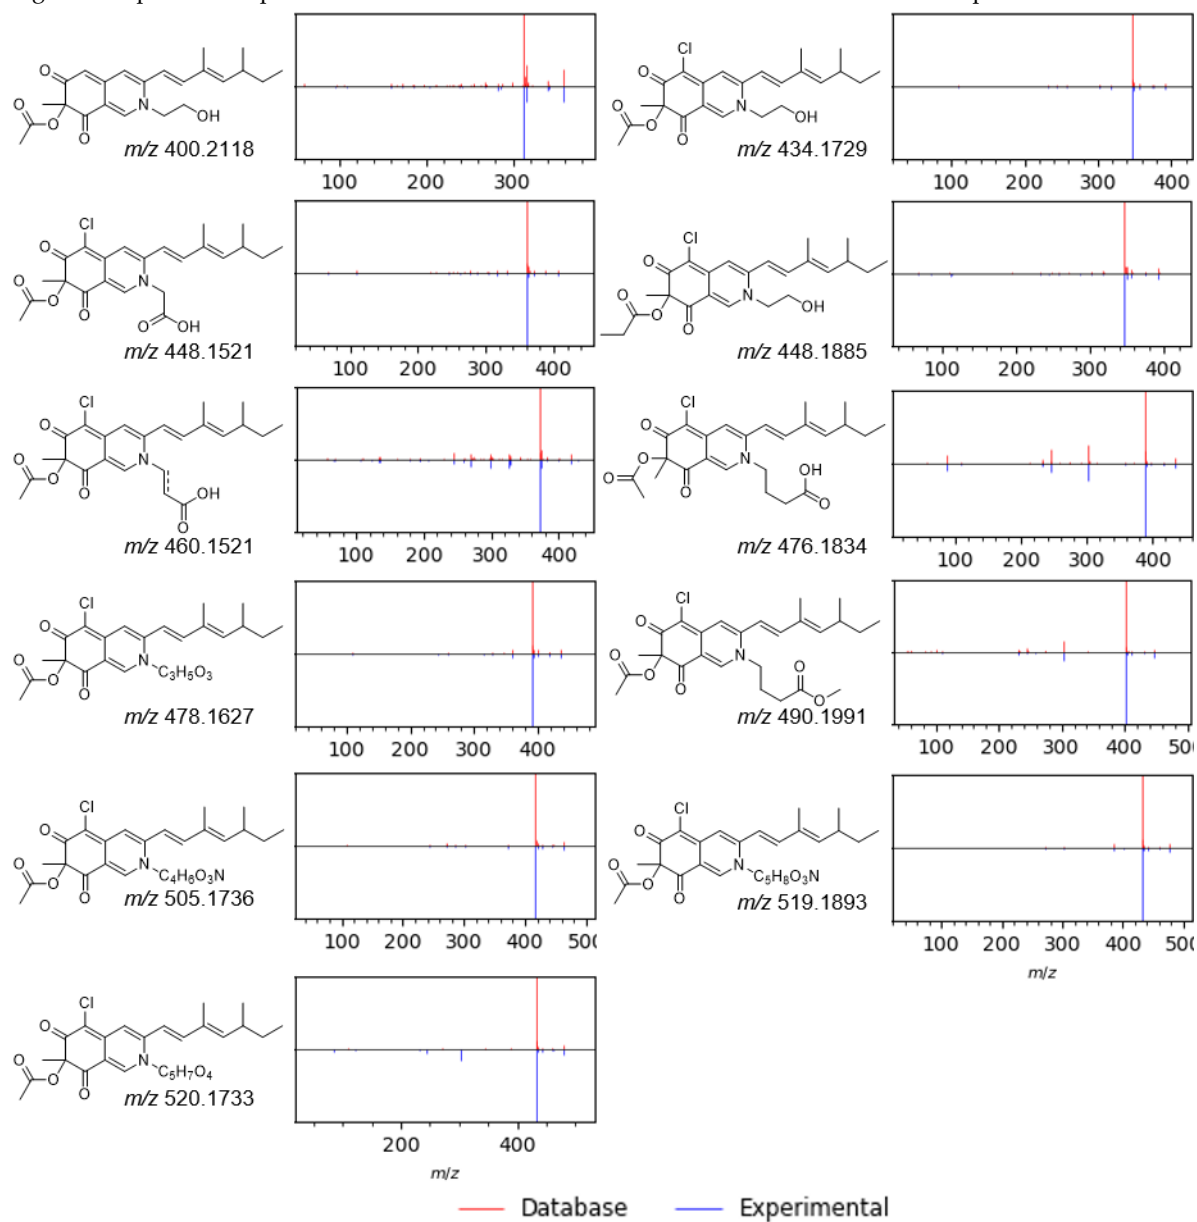



Table S5: Cluster E features annotated by MS/MS database query. In-house database was built upon annotations from Hebra et al.<sup>1</sup>

| ClusterE           |             |                                                   |                                  |          |              |            |        |                          |                   |
|--------------------|-------------|---------------------------------------------------|----------------------------------|----------|--------------|------------|--------|--------------------------|-------------------|
| [M+H] <sup>+</sup> | Error (ppm) | Formula                                           | Name                             | Database | Cosine score | Annotation | Ref    | $\epsilon(\lambda_{nm})$ | Minimal condition |
| 380.1860           | -1.0        | C <sub>23</sub> H <sub>25</sub> NO <sub>4</sub>   | Peniazaphilone E                 | In house | 0.93         | Level 1    | [1]    | 9100(548)                | PD                |
| 381.1705           | -2.2        | C <sub>23</sub> H <sub>24</sub> O <sub>5</sub>    |                                  | In-house | 0.79         | Level 2    | [1]    |                          | PD                |
| 392.1618           | 1.3         | C <sub>21</sub> H <sub>26</sub> ClNO <sub>4</sub> | Deacetyl-<br>isochromophilone VI | In-house | 0.91         | Level 1    | [1]    |                          | YE                |
| 424.2119           | -0.1        | C <sub>25</sub> H <sub>29</sub> NO <sub>5</sub>   | Peniazaphilone A                 | In-house | 0.93         | Level 1    | [1,11] | 10900(541)               | CZK               |

Level 0 corresponds annotations from isolated pure compounds; level 1 to annotations by comparison with standards; level 2 to putative annotations (e.g., MS/MS library comparison or tentative structure); level 3 to a chemical class assignment

Figure S5: Spectral comparison of cluster E molecules with databases and their theoretical protonated  $m/z$ .

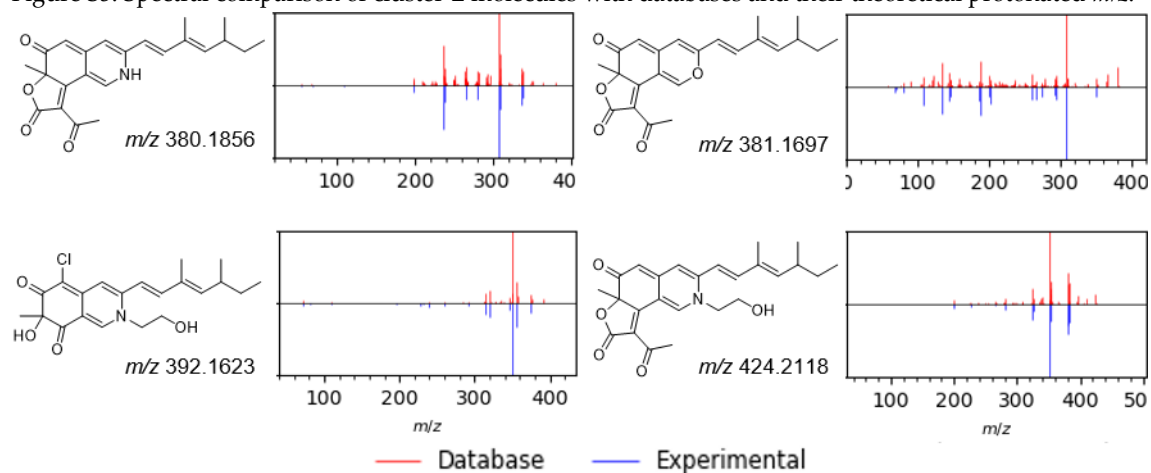

Table S6: Annotation of azaphilones from cluster D-I with proposed chain structure from molecular network data and KEGG compound database.<sup>12</sup>

| Cluster D-I |                    |             |                                                              |                  |                                     |           |                              |
|-------------|--------------------|-------------|--------------------------------------------------------------|------------------|-------------------------------------|-----------|------------------------------|
| ID          | [M+H] <sup>+</sup> | Error (ppm) | Chain Formula                                                | Kegg_ID          | Chain                               | Acylation | Supplementary information    |
| 4           | 434.1732           | -0.8        | C <sub>2</sub> H <sub>7</sub> NO                             | C00189           | Ethanolamine                        | Acetyl    | No Cl on azaphilone scaffold |
| 6           | 400.2138           | -4.9        | C <sub>2</sub> H <sub>7</sub> NO                             | C00189           | Ethanolamine                        | Acetyl    |                              |
| 7           | 404.1635           | -3.0        | CH <sub>5</sub> N                                            | C00218           | Methylamine                         | Acetyl    |                              |
| 8           | 446.1734           | -1.2        | C <sub>3</sub> H <sub>7</sub> NO                             | C01888<br>C05665 | Aminoacetone<br>3-Aminopropanal     | Acetyl    |                              |
| 9           | 446.1746           | -3.9        | C <sub>3</sub> H <sub>7</sub> NO                             | C01888<br>C05665 | Aminoacetone<br>3-Aminopropanal     | Acetyl    |                              |
| 10          | 448.1526           | -1.0        | C <sub>2</sub> H <sub>5</sub> NO <sub>2</sub>                | C00037           | Glycine                             | Acetyl    |                              |
| 11          | 448.1901           | -3.5        | C <sub>2</sub> H <sub>7</sub> NO                             | C00189           | Ethanolamine                        | Propionyl |                              |
| 12          | 460.1530           | -1.9        | C <sub>3</sub> H <sub>5</sub> NO <sub>2</sub>                | C02218<br>C20253 | Dehydroalanine<br>Aminoacrylate     | Acetyl    |                              |
| 13          | 460.1901           | -3.4        | C <sub>3</sub> H <sub>7</sub> NO                             | C01888<br>C05665 | Aminoacetone<br>3-Aminopropanal     | Propionyl |                              |
| 14          | 460.1901           | -3.4        | C <sub>4</sub> H <sub>9</sub> NO                             | C00555           | 4-Aminobutanal                      | Acetyl    |                              |
| 15          | 460.2261           | -2.6        | C <sub>5</sub> H <sub>13</sub> N                             | C02640           | Isoamylamine                        | Acetyl    |                              |
| 16          | 462.1690           | -2.6        | C <sub>3</sub> H <sub>7</sub> NO <sub>2</sub>                | C00041           | Alanine                             | Acetyl    |                              |
| 17          | 474.2052           | -2.2        | C <sub>5</sub> H <sub>11</sub> NO                            | C01842<br>C12455 | Pentanamide<br>5-Aminopentanal      | Acetyl    |                              |
| 18          | 474.2054           | -2.6        | C <sub>5</sub> H <sub>11</sub> NO                            | C01842<br>C10974 | Pentanamide<br>4-Methylaminobutanal | Acetyl    |                              |
| 19          | 476.1834           | -0.1        | C <sub>4</sub> H <sub>9</sub> NO <sub>2</sub>                |                  | Methoxyacetamide                    | Acetyl    |                              |
| 20          | 476.1840           | -1.2        | C <sub>4</sub> H <sub>9</sub> NO <sub>2</sub>                | C00334           | 4-Aminobutanoate                    | Acetyl    |                              |
| 21          | 478.1617           | 2.1         | C <sub>3</sub> H <sub>7</sub> NO <sub>3</sub>                | C00065           | Serine                              | Acetyl    |                              |
| 22          | 490.1997           | -1.2        | C <sub>5</sub> H <sub>11</sub> NO <sub>2</sub>               | C00183           | Valine                              | Acetyl    |                              |
| 23          | 501.2175           | -4.9        | C <sub>6</sub> H <sub>12</sub> N <sub>2</sub> O              | C19809           | Piperidine-2-carboxamide            | Acetyl    |                              |
| 24          | 504.2157           | -1.9        | C <sub>6</sub> H <sub>13</sub> NO <sub>2</sub>               | C00123<br>C00407 | Leucine<br>Isoleucine               | Acetyl    |                              |
| 25          | 505.1740           | -0.8        | C <sub>4</sub> H <sub>8</sub> N <sub>2</sub> O <sub>3</sub>  | C00152           | Asparagine                          | Acetyl    |                              |
| 26          | 518.2314           | -2.0        | C <sub>6</sub> H <sub>13</sub> NO <sub>2</sub>               | C00123<br>C00407 | Leucine<br>Isoleucine               | Propionyl |                              |
| 27          | 519.1902           | -1.8        | C <sub>5</sub> H <sub>10</sub> N <sub>2</sub> O <sub>3</sub> | C00064           | Glutamine                           | Acetyl    |                              |
| 28          | 519.2266           | -1.9        | C <sub>6</sub> H <sub>14</sub> N <sub>2</sub> O <sub>2</sub> | C00047           | Lysine                              | Acetyl    |                              |
| 29          | 520.1735           | -0.4        | C <sub>5</sub> H <sub>9</sub> NO <sub>4</sub>                | C00025           | Glutamate                           | Acetyl    |                              |
| 30          | 536.2054           | -1.6        | C <sub>6</sub> H <sub>13</sub> NO <sub>4</sub>               | C22301           | Dihydroxyisoleucine                 | Acetyl    |                              |
| 31          | 538.2001           | -1.9        | C <sub>9</sub> H <sub>11</sub> NO <sub>2</sub>               | C00079           | Phenylalanine                       | Acetyl    |                              |
| 32          | 547.2212           | -1.2        | C <sub>7</sub> H <sub>14</sub> N <sub>2</sub> O <sub>3</sub> | C00437           | N-Acetylornithine                   | Acetyl    |                              |
| 33          | 550.2214           | -2.2        | C <sub>6</sub> H <sub>13</sub> NO <sub>4</sub>               | C22301           | Dihydroxyisoleucine                 | Propionyl |                              |
| 34          | 552.2173           | 4.6         | C <sub>9</sub> H <sub>11</sub> NO <sub>2</sub>               | C00079           | Phenylalanine                       | Propionyl |                              |
| 35          | 554.1929           | 2.0         | C <sub>9</sub> H <sub>11</sub> NO <sub>3</sub>               | C00082           | Tyrosine                            | Acetyl    |                              |

Table S7: Annotation of azaphilones from cluster D-II with proposed chain structure from molecular network data and KEGG compound database.<sup>12</sup>

| Cluster DII |                    |             |                                                  |                  |                                |           |                              |
|-------------|--------------------|-------------|--------------------------------------------------|------------------|--------------------------------|-----------|------------------------------|
| ID          | [M+H] <sup>+</sup> | Error (ppm) | Chain Formula                                    | Kegg_ID          | Chain                          | Acylation | Supplementary information    |
| 36          | 460.2493           | -2.3        | C <sub>8</sub> H <sub>11</sub> N                 | C02455           | Phenylethylamine               | Acetyl    | No Cl on azaphilone scaffold |
| 37          | 476.2427           | 1.0         | C <sub>8</sub> H <sub>11</sub> NO                | C00483<br>C01183 | Tyramine<br>Phenylethanolamine | Acetyl    | No Cl on azaphilone scaffold |
| 38          | 484.2012           | 2.6         | C <sub>5</sub> H <sub>9</sub> N <sub>3</sub>     | C00388           | Histamine                      | Acetyl    |                              |
| 39          | 494.2105           | -2.5        | C <sub>8</sub> H <sub>11</sub> N                 | C02455           | Phenylethylamine               | Acetyl    |                              |
| 40          | 503.2301           | 1.3         | C <sub>6</sub> H <sub>14</sub> N <sub>2</sub> O  | C02714           | N-Acetylputrescine             | Acetyl    |                              |
| 41          | 508.2254           | -1.0        | C <sub>8</sub> H <sub>11</sub> N                 | C02455           | Phenylethylamine               | Propionyl |                              |
| 42          | 510.2046           | -0.8        | C <sub>8</sub> H <sub>11</sub> NO                | C00483<br>C01183 | Tyramine<br>Phenylethanolamine | Acetyl    |                              |
| 43          | 510.2055           | -2.6        | C <sub>8</sub> H <sub>11</sub> NO                | C00483<br>C01183 | Tyramine<br>Phenylethanolamine | Acetyl    |                              |
| 44          | 522.1721           | -1.8        | C <sub>5</sub> H <sub>11</sub> NO <sub>2</sub> S | C00073           | Methionine                     | Acetyl    |                              |
| 45          | 522.2418           | -2.4        | C <sub>8</sub> H <sub>11</sub> N                 | C02455           | Phenylethylamine               | Butyl     |                              |
| 46          | 524.2208           | -1.9        | C <sub>8</sub> H <sub>11</sub> NO                | C00483<br>C01183 | Tyramine<br>Phenylethanolamine | Propionyl |                              |
| 47          | 526.1997           | -1.2        | C <sub>8</sub> H <sub>11</sub> NO <sub>2</sub>   | C03758<br>C04227 | Dopamine<br>Octopamine         | Acetyl    |                              |
| 48          | 540.2140           | 1.4         | C <sub>8</sub> H <sub>11</sub> NO <sub>2</sub>   | C03758<br>C04227 | Dopamine<br>Octopamine         | Propionyl |                              |

Table S8: Annotation of azaphilones from cluster D-III with proposed chain structure from molecular network data and KEGG compound database.<sup>12</sup>

| Cluster DIII |                    |             |                                                               |         |              |           |                           |
|--------------|--------------------|-------------|---------------------------------------------------------------|---------|--------------|-----------|---------------------------|
| ID           | [M+H] <sup>+</sup> | Error (ppm) | Chain Formula                                                 | Kegg_ID | Chain        | Acylation | Supplementary information |
| 49           | 541.2108           | -1.5        | C <sub>8</sub> H <sub>12</sub> N <sub>2</sub> O <sub>2</sub>  | C00534  | Pyridoxamine | Acetyl    |                           |
| 50           | 577.2112           | -2.1        | C <sub>11</sub> H <sub>12</sub> N <sub>2</sub> O <sub>2</sub> | C00078  | Tryptophane  | Acetyl    |                           |

Figure S6: Subdivision of Cluster D based on annotated features

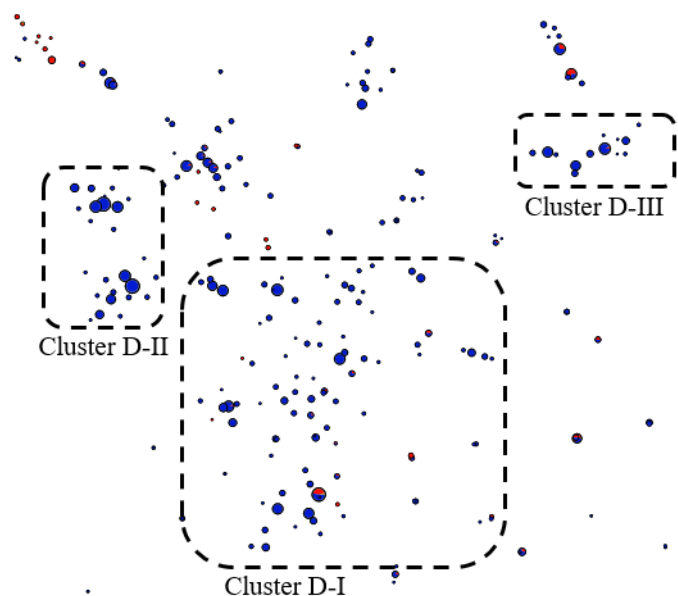

Table S9: Annotation of azaphilones from cluster E with proposed chain structure from molecular network data and KEGG compound database.<sup>12</sup>

| Cluster E |                    |             |                                                               |                  |                                 |                           |
|-----------|--------------------|-------------|---------------------------------------------------------------|------------------|---------------------------------|---------------------------|
| ID        | [M+H] <sup>+</sup> | Error (ppm) | Chain Formula                                                 | Kegg_ID          | Chain                           | Supplementary information |
| 5         | 380.186            | -1.0        | NH <sub>3</sub>                                               | C00014           | Ammonium                        |                           |
| 51        | 396.1809           | -0.9        | NH <sub>3</sub>                                               | C00014           | Ammonium                        | Epoxy-azaphilone          |
| 52        | 424.2119           | -0.1        | C <sub>2</sub> H <sub>7</sub> NO                              | C00189           | Ethanolamine                    |                           |
| 53        | 436.212            | -0.4        | C <sub>3</sub> H <sub>7</sub> NO                              | C01888<br>C05665 | Aminoacetone<br>3-Aminopropanal |                           |
| 54        | 450.2646           | -1.6        | C <sub>3</sub> H <sub>13</sub> N                              | C02640           | Isoamylamine                    |                           |
| 55        | 484.2491           | -1.8        | C <sub>8</sub> H <sub>11</sub> N                              | C02455           | Phenylethylamine                |                           |
| 56        | 494.2551           | -2.8        | C <sub>6</sub> H <sub>13</sub> NO <sub>2</sub>                | C00123<br>C00407 | Leucine/Isoleucine              |                           |
| 57        | 500.2439           | -1.5        | C <sub>8</sub> H <sub>11</sub> N                              | C02455           | Tyramine<br>Phenylethanolamine  | Epoxy-azaphilone          |
| 58        | 500.2445           | -2.7        | C <sub>8</sub> H <sub>11</sub> NO                             | C00483<br>C01183 | Tyramine<br>Phenylethanolamine  |                           |
| 59        | 516.2394           | -2.6        | C <sub>8</sub> H <sub>11</sub> NO                             | C00483<br>C01183 | Tyramine<br>Phenylethanolamine  | Epoxy-azaphilone          |
| 60        | 528.2386           | -1.0        | C <sub>9</sub> H <sub>11</sub> NO <sub>2</sub>                | C00079           | Phenylalanine                   |                           |
| 61        | 534.2005           | 7.0         | C <sub>8</sub> H <sub>11</sub> NO                             | C00483<br>C01183 | Tyramine<br>Phenylethanolamine  | Chlorination              |
| 62        | 567.2502           | -2.2        | C <sub>11</sub> H <sub>12</sub> N <sub>2</sub> O <sub>2</sub> | C00078           | Tryptophane                     |                           |

Figure 1 displays the chemical structures of 12 compounds and their predicted activity profiles. The compounds are arranged around a central cluster of colored dots representing activity profiles. A legend indicates: CZK (yellow), PD (red), and YE (blue). The compounds are: 50 (a complex polycyclic structure with X and R), 51 (epoxy), 52 (epoxy), 53 (diol), 54 (a branched chain with a carboxylic acid), 55 (a branched chain with a carboxylic acid), 56 (a branched chain with a carboxylic acid), 57 (epoxy), 58 (phenol), 59 (epoxy), 60 (a branched chain with a carboxylic acid), and 61 (Cl).

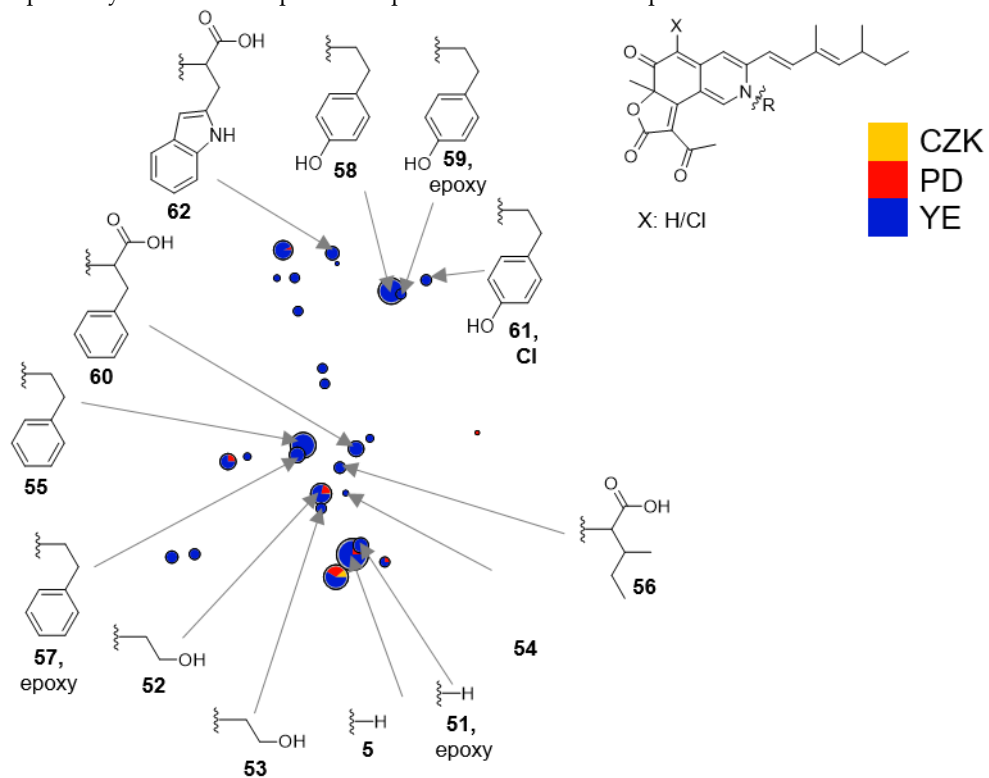

Figure S8: HRMS spectrum for compound **24'**

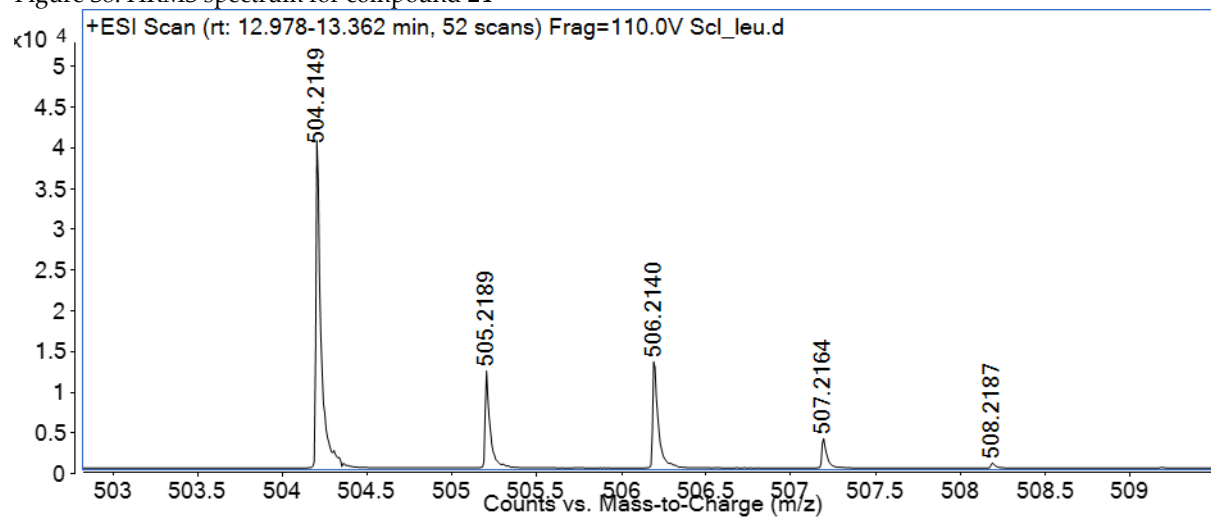

Figure S9:  $^1\text{H}$  NMR spectrum (500 MHz,  $\text{CD}_3\text{CN}$ ) of compound **24'**

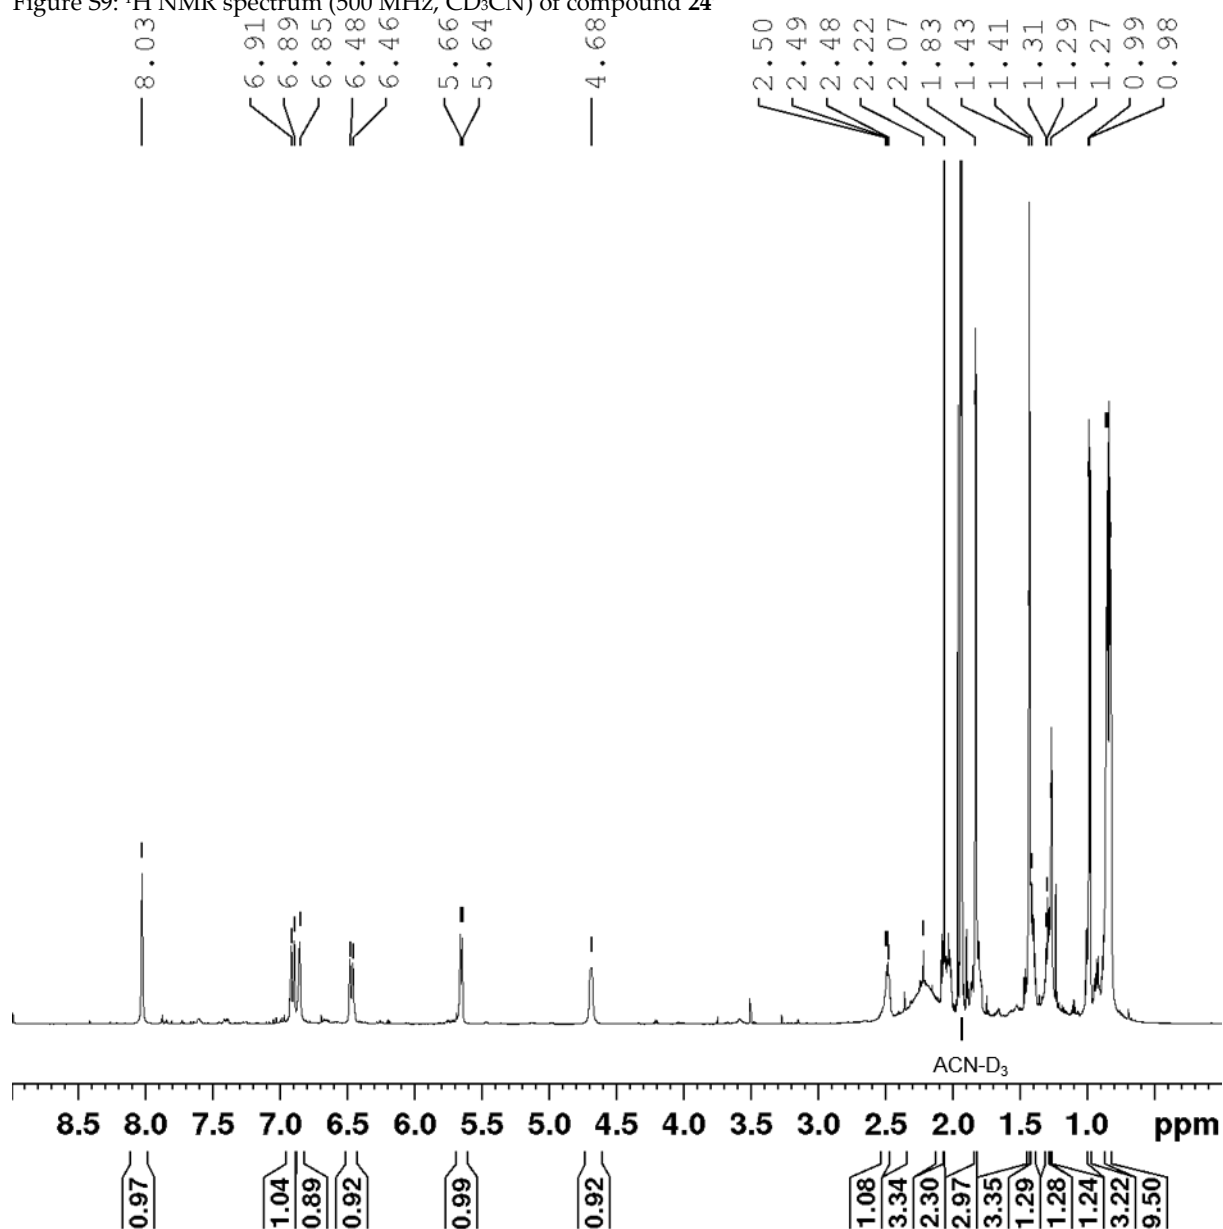

Figure S10:  $^{13}\text{C}$  NMR spectrum (700 MHz,  $\text{CD}_3\text{CN}$ ) of compound **24'**

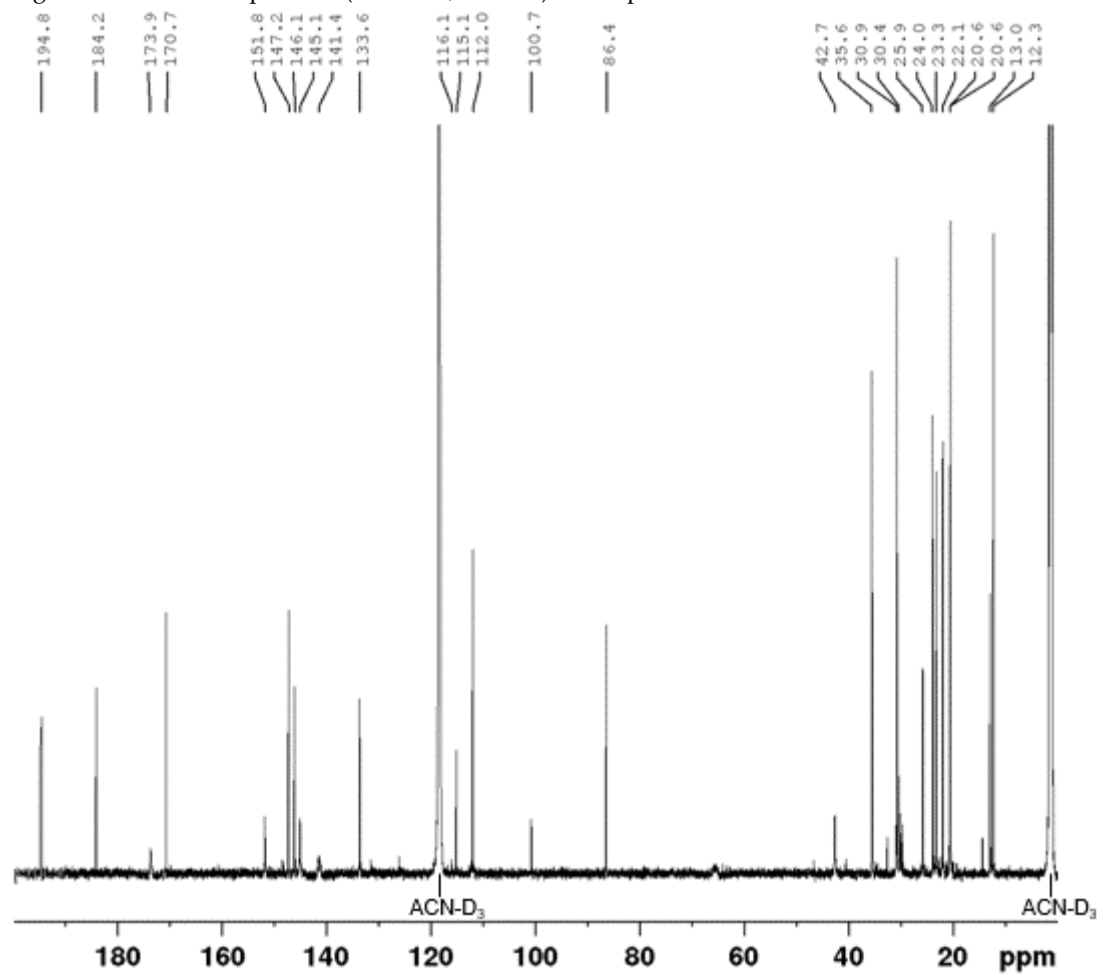



Figure S 11: HRMS spectrum for compound 39'

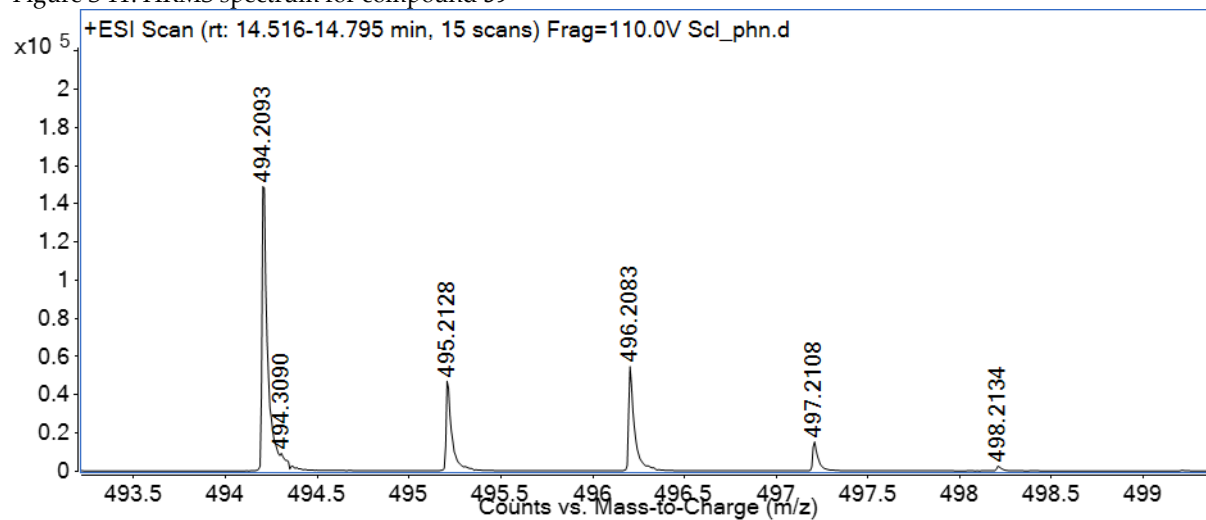

Figure S12:  $^1\text{H}$  NMR spectrum (500 MHz,  $\text{CDCl}_3$ ) of compound **39'**

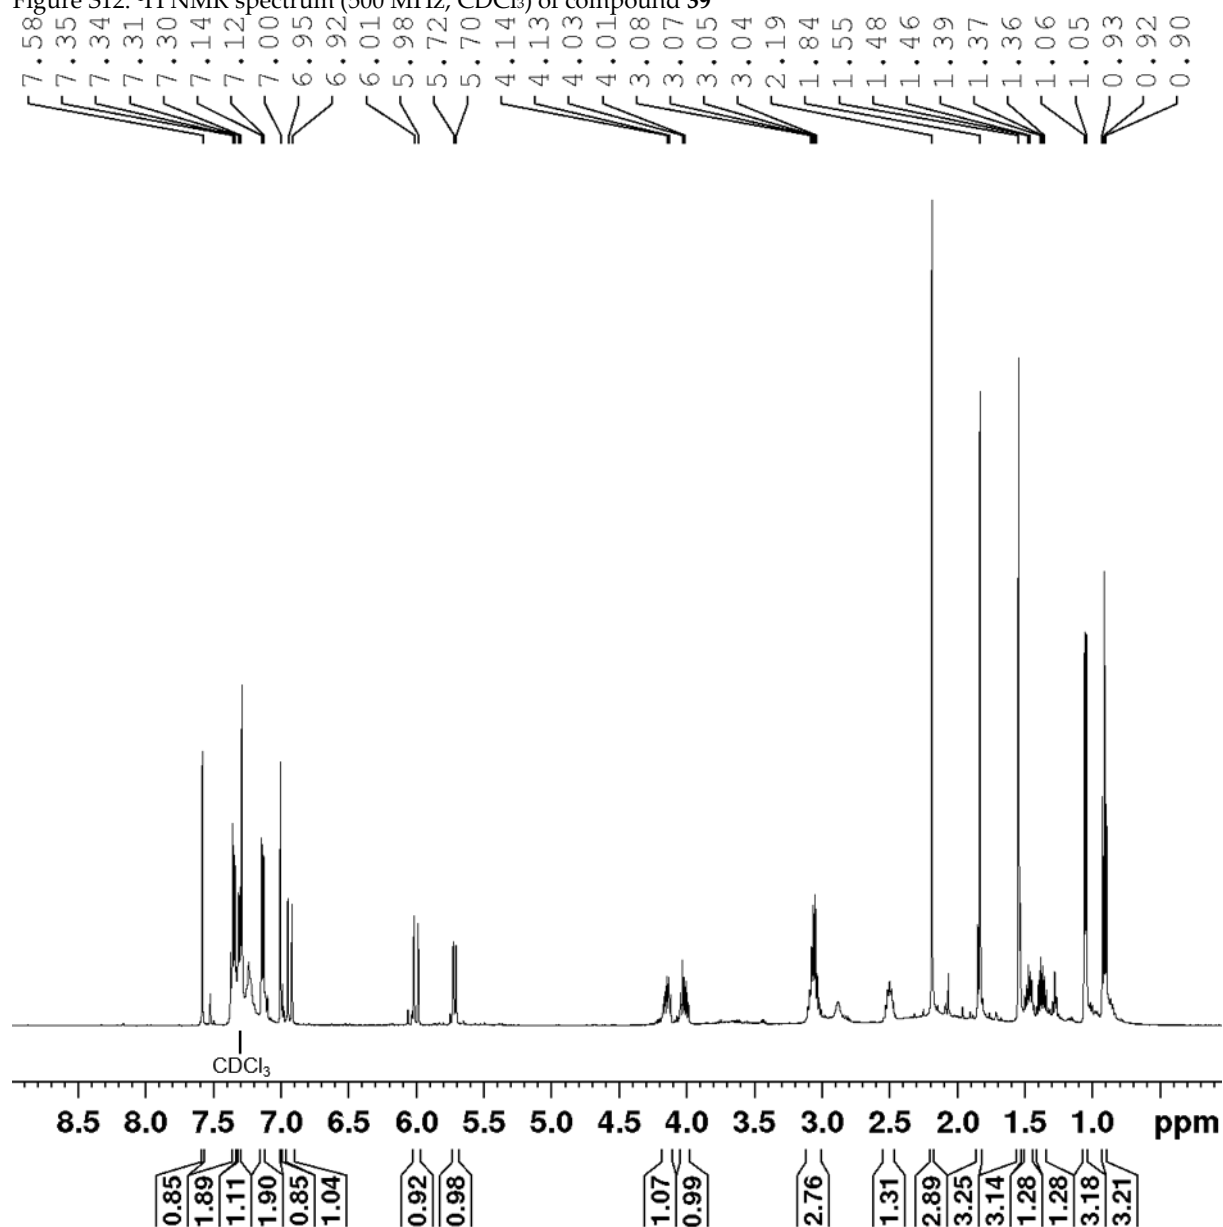

Figure S13:  $^{13}\text{C}$  NMR spectrum (500 MHz,  $\text{CDCl}_3$ ) of compound **39'**

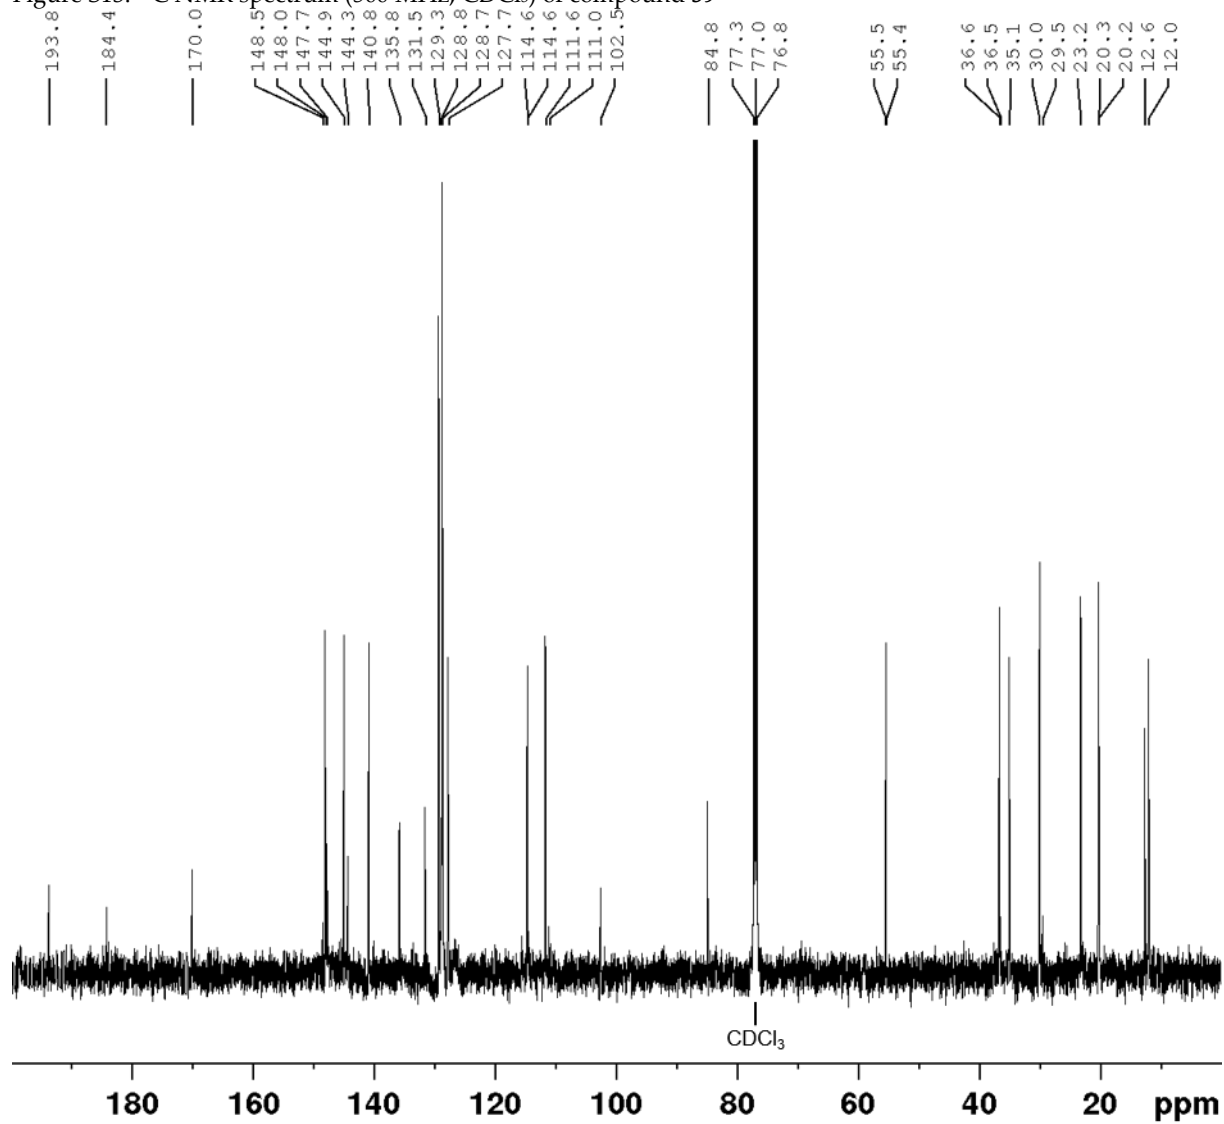

Figure S14: HRMS spectrum for compound 50'

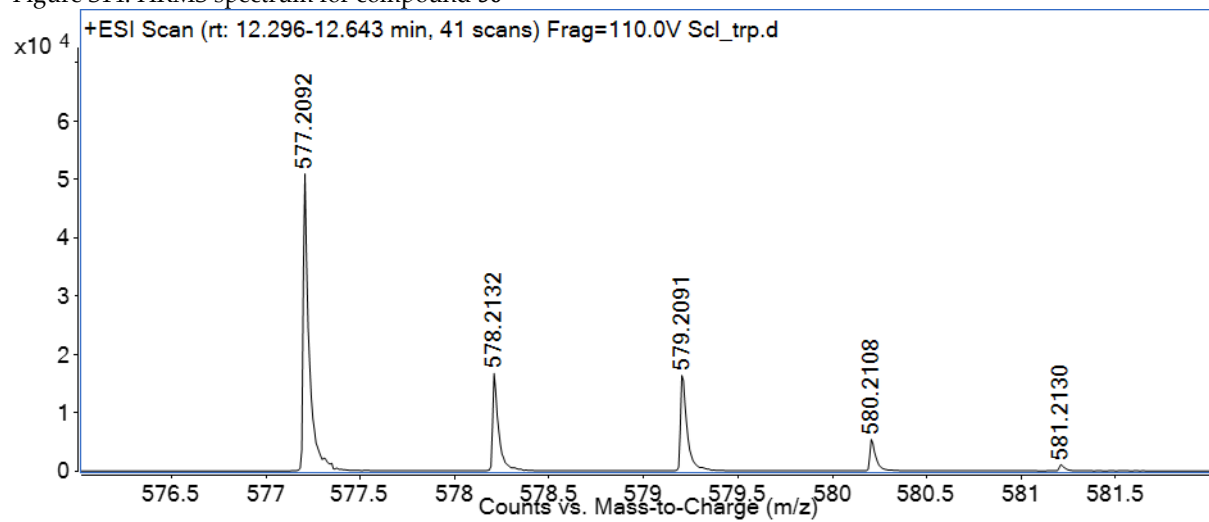

Figure S15:  $^1\text{H}$  NMR spectrum (500 MHz, MeOD) of compound **50'**

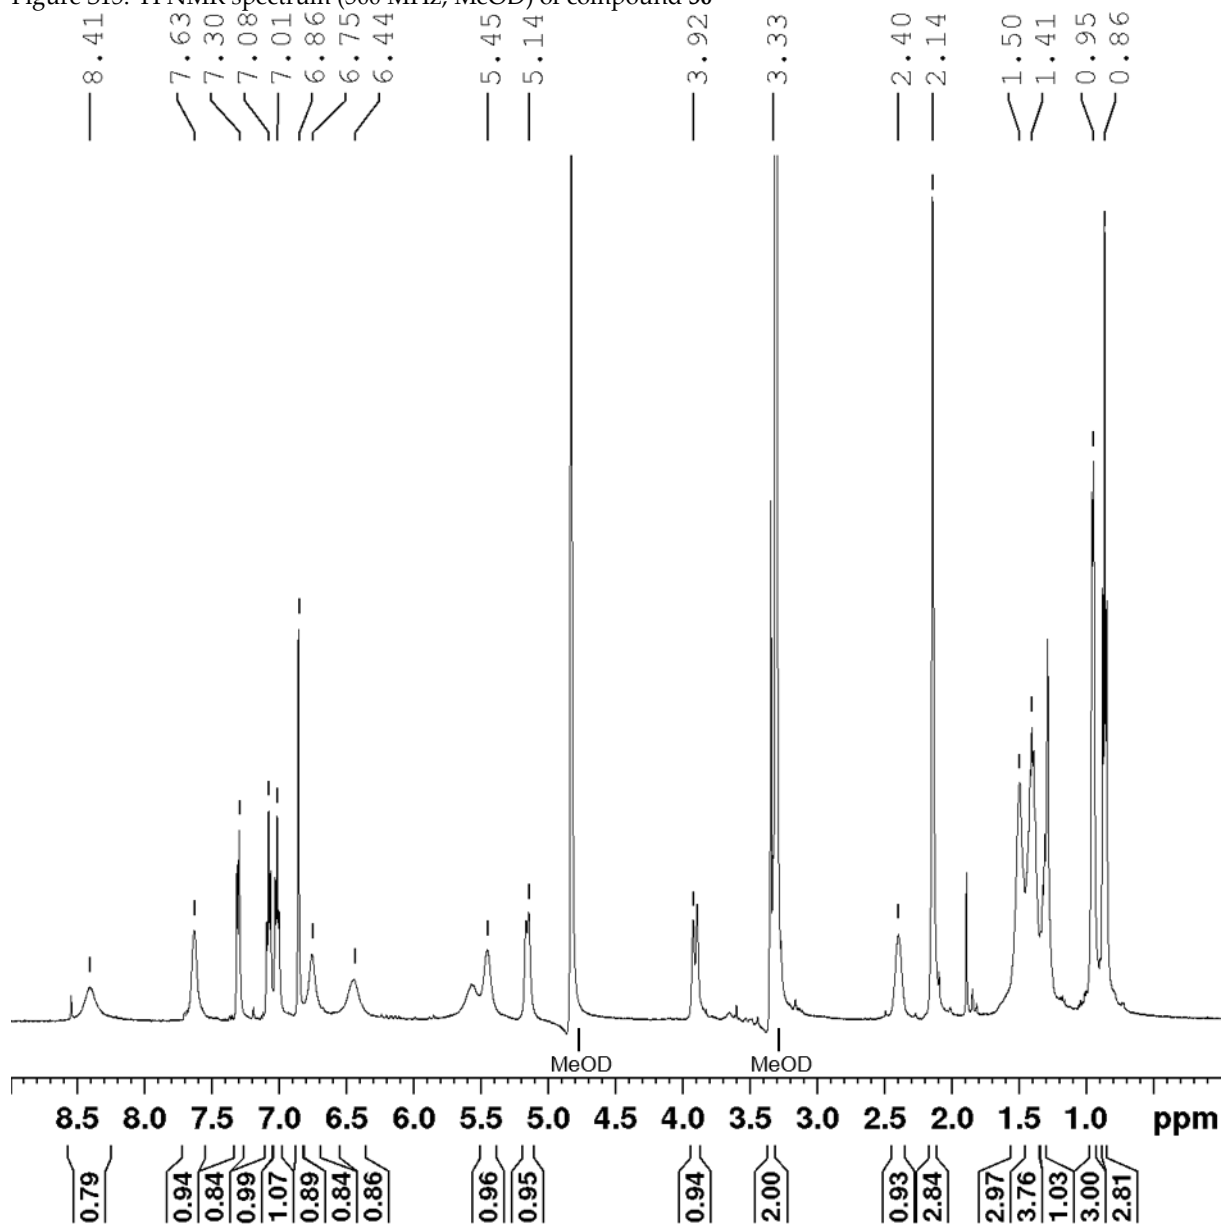

Figure S16:  $^{13}\text{C}$  NMR spectrum (500, MHz, MeOD) of compound **50'**

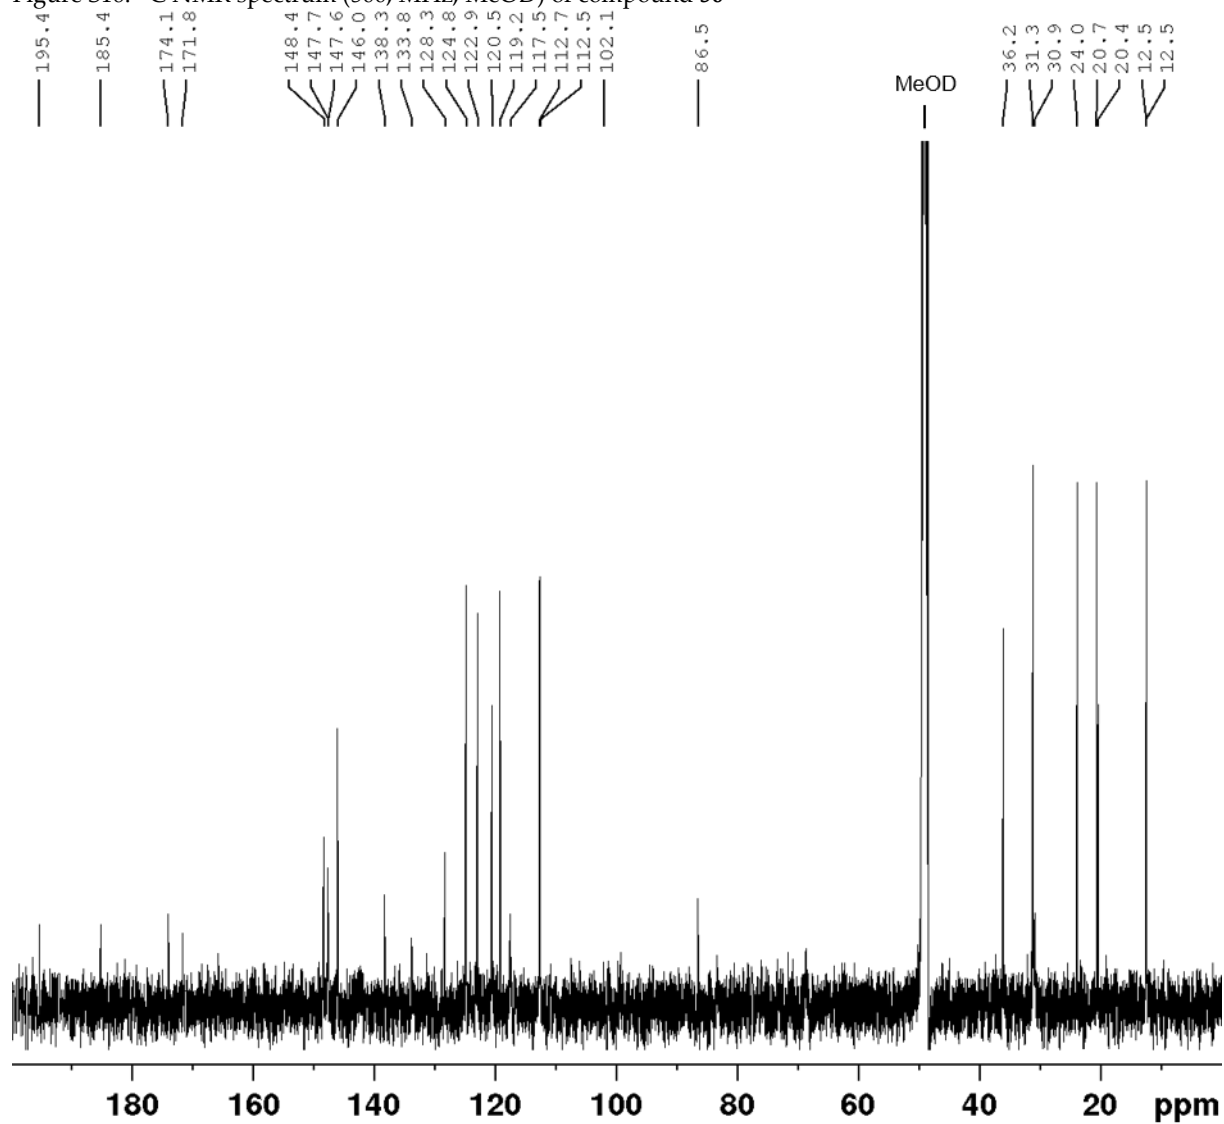

Figure S17: Comparison of fragmentation spectra and retention time from hemisynthetized standards with metabolites **24**, **39** and **50** produced by *P. sclerotiorum* SNB-CN111.

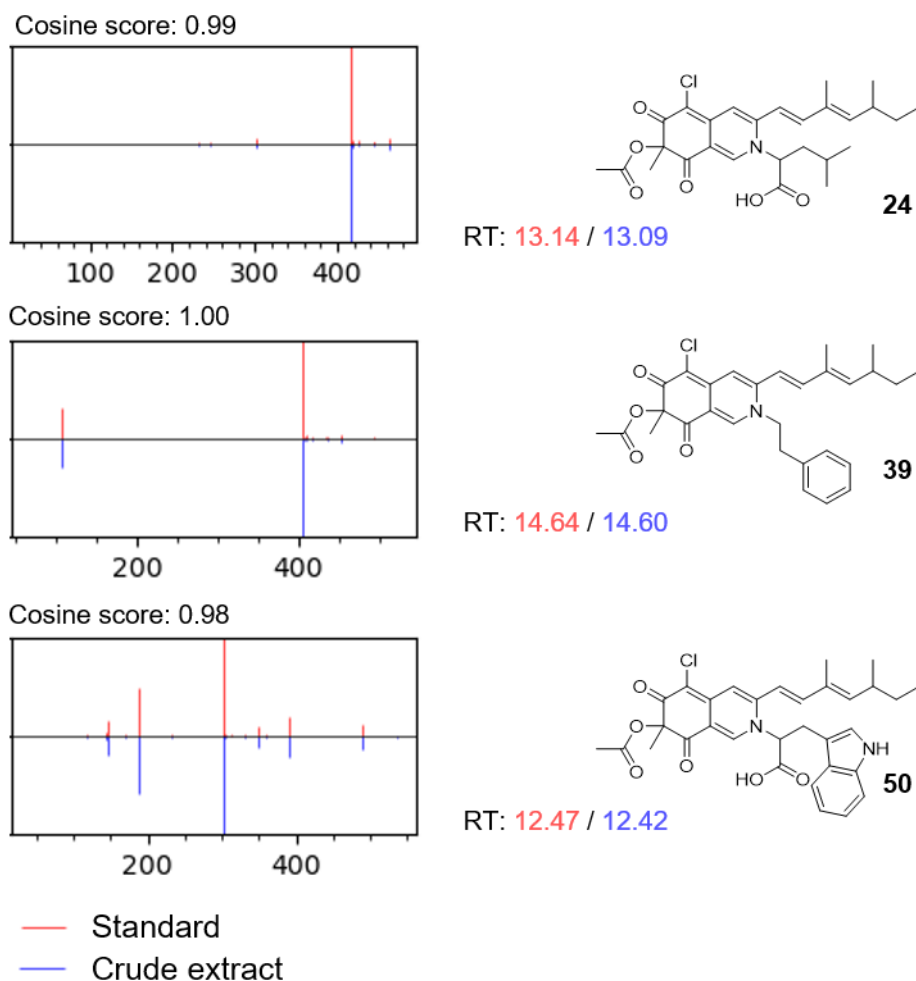

Table S10: Absorbance at 500, 460 and 400 nm of *P. sclerotiorum* SNB-CN111 crude extracts from fermentation on solid CZK, PD and YE. Values are given in AU.g<sup>-1</sup> of culture medium.

| AU <sub>nm</sub> .g <sup>-1</sup> | CZK | PD   | YE    |
|-----------------------------------|-----|------|-------|
| OD <sub>500</sub>                 | 0.4 | 6.0  | 59.6  |
| OD <sub>460</sub>                 | 1.0 | 10.4 | 64.9  |
| OD <sub>400</sub>                 | 4.9 | 47.5 | 213.2 |

Table S11: Absorbance at 500, 460 and 400 nm of *P. sclerotiorum* SNB-CN111 crude extracts from fermentation on solid CZK supplemented with ammonium acetate or ethanolamine at 0, 0.1, 0.5 and 2 g.L<sup>-1</sup>. Values are given in AU.g<sup>-1</sup> of culture medium.

| AU <sub>nm</sub> .g <sup>-1</sup> | CZK + ammonium acetate (g.L <sup>-1</sup> ) |     |     |     | CZK + ethanolamine (g.L <sup>-1</sup> ) |     |     |     |
|-----------------------------------|---------------------------------------------|-----|-----|-----|-----------------------------------------|-----|-----|-----|
|                                   | 0                                           | 0.1 | 0.5 | 2   | 0                                       | 0.1 | 0.5 | 2   |
| OD <sub>500</sub>                 | 0.4                                         | 0.5 | 0.4 | 0.2 | 0.4                                     | 0.5 | 0.5 | 0.4 |
| OD <sub>460</sub>                 | 1.0                                         | 1.1 | 0.8 | 0.6 | 1.0                                     | 1.1 | 1.1 | 0.7 |
| OD <sub>400</sub>                 | 4.9                                         | 4.2 | 2.8 | 2.7 | 4.9                                     | 4.0 | 4.4 | 2.4 |



Figure S18: Extracted chromatogram for molecules **1** ( $[M+H]^+$ ,  $m/z$  391.1307), **3** ( $[M+H]^+$ ,  $m/z$  390.1467) and **4** ( $[M+H]^+$ ,  $m/z$  434.1729) as a function of the concentration of ammonium acetate or ethanolamine added to solid CZK medium.

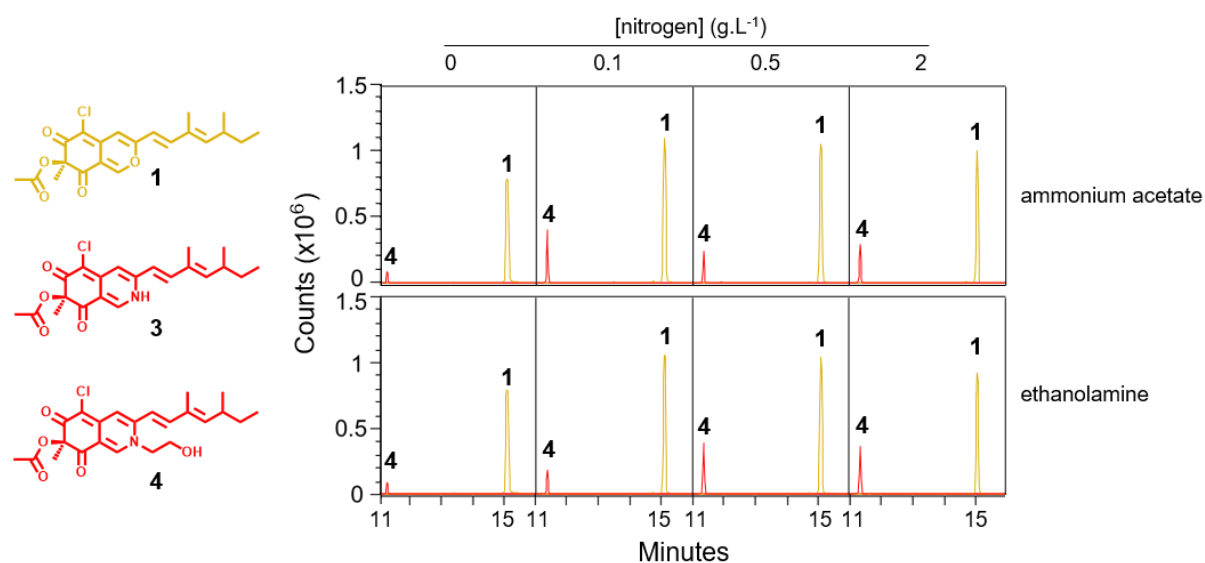

Table S12: Absorbance at 500, 460 and 400 nm of *P. sclerotiorum* SNB-CN111 crude extracts from two step fermentation process on porous cellophane membrane on solid CZK supplemented with ammonium acetate or ethanolamine at 0, 0.1, 0.5 and 2 g.L<sup>-1</sup>. Values are given in AU.g<sup>-1</sup> of culture medium.

| AU <sub>nm</sub> .g <sup>-1</sup> | Two step fermentation<br>CZK + ammonium acetate (g.L <sup>-1</sup> ) |      |      |      | Two step fermentation<br>CZK + ethanolamine (g.L <sup>-1</sup> ) |      |      |      |
|-----------------------------------|----------------------------------------------------------------------|------|------|------|------------------------------------------------------------------|------|------|------|
|                                   | 0                                                                    | 0.1  | 0.5  | 2    | 0                                                                | 0.1  | 0.5  | 2    |
| OD <sub>500</sub>                 | 0.4                                                                  | 0.9  | 1.6  | 4.5  | 0.4                                                              | 1.8  | 2.2  | 4.6  |
| OD <sub>460</sub>                 | 1.0                                                                  | 2.1  | 3.2  | 10.3 | 1.0                                                              | 4.2  | 5.1  | 8.9  |
| OD <sub>400</sub>                 | 4.9                                                                  | 10.3 | 11.8 | 37.1 | 4.9                                                              | 16.1 | 21.2 | 40.0 |

Table S13: Absorbance at 500, 460, and 400 nm of *P. sclerotiorum* SNB-CN111 crude extracts from two step fermentation process on porous cellophane membrane on solid CZK supplemented with propargilamine at 0, 0.1, 0.5 and 2 g.L<sup>-1</sup>. Values are given in AU.g<sup>-1</sup> of culture medium.

| AU <sub>nm</sub> .g <sup>-1</sup> | Two step fermentation<br>CZK + propargilamine (g.L <sup>-1</sup> ) |       |       |       |
|-----------------------------------|--------------------------------------------------------------------|-------|-------|-------|
|                                   | 0                                                                  | 0.1   | 0.5   | 2     |
| OD <sub>500</sub>                 | 0.4                                                                | 22.5  | 68.0  | 49.9  |
| OD <sub>460</sub>                 | 1.0                                                                | 38.3  | 91.7  | 68.2  |
| OD <sub>400</sub>                 | 4.9                                                                | 155.1 | 335.4 | 258.6 |

Figure S19: Metabolic profile of from *P. sclerotiorum* SNB-CN111 fermentation on solid CZK crude extract and two step fermentation process on porous cellophane membrane on solid CZK supplemented with propargilamine 0.5 g.L<sup>-1</sup>.

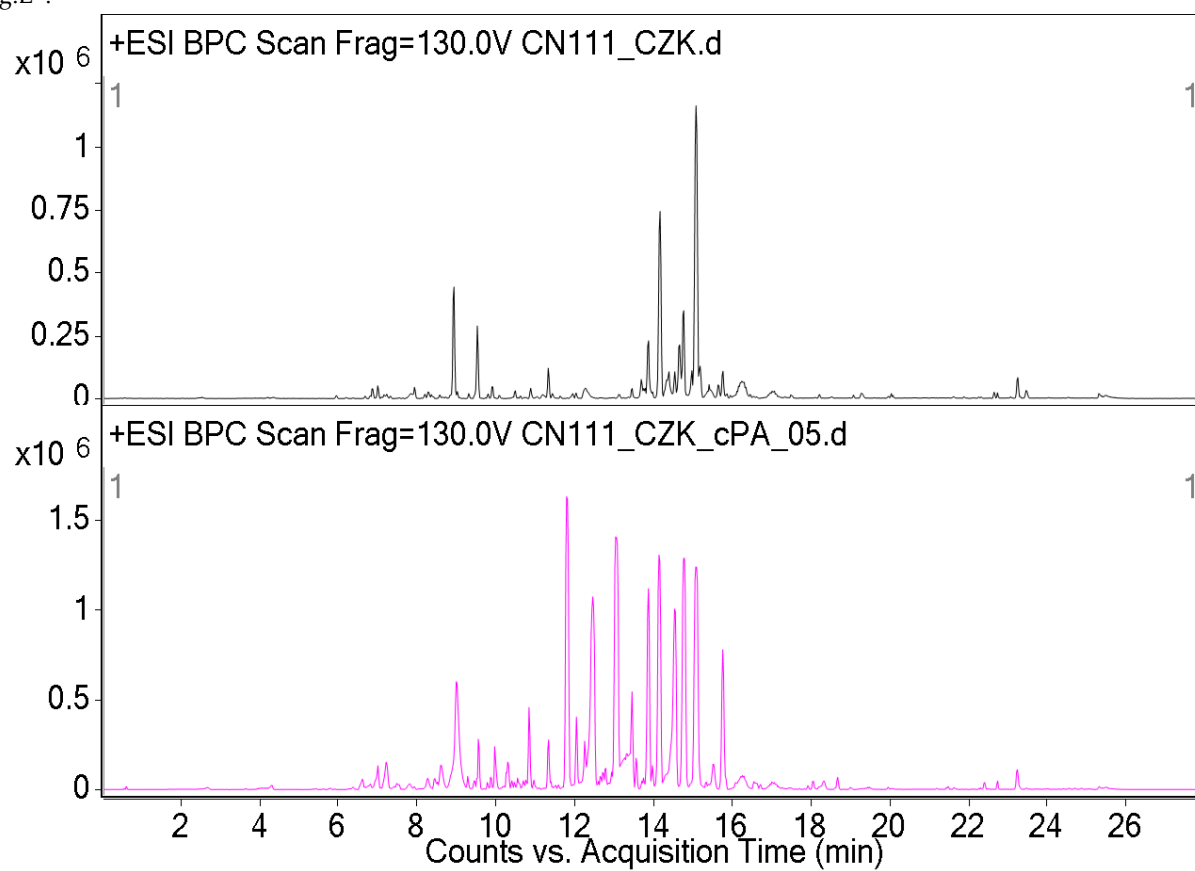

Figure S20: Base pic chromatogram of fraction F1 from flash chromatography of pulled two step fermentation process on porous cellophane membrane on solid CZK supplemented with propargilamine crude extracts.

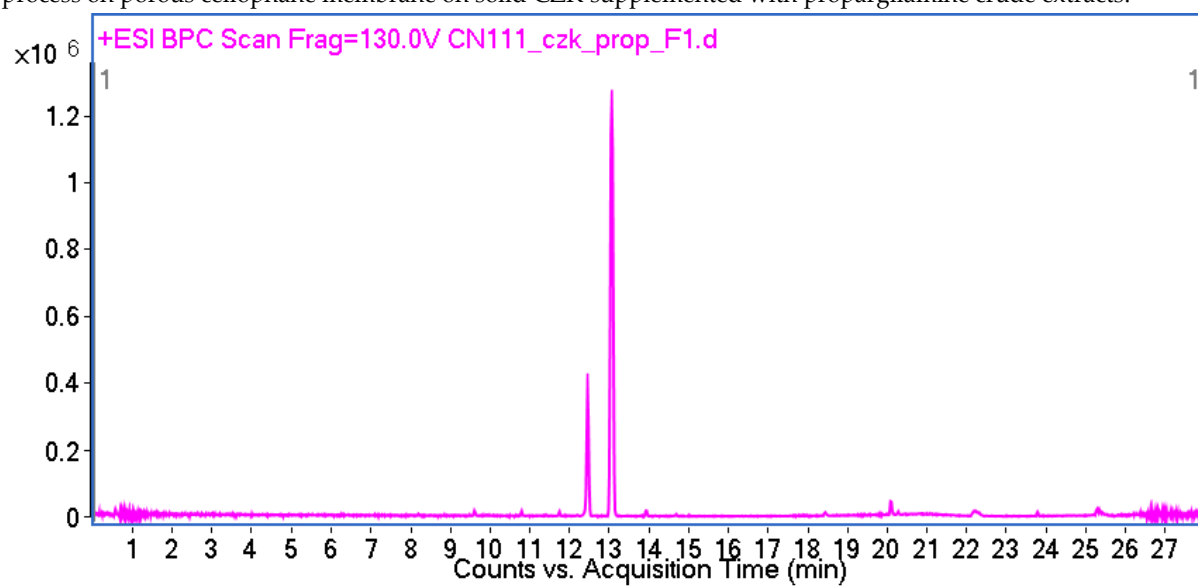

Figure S21 HRMS of compound 63.

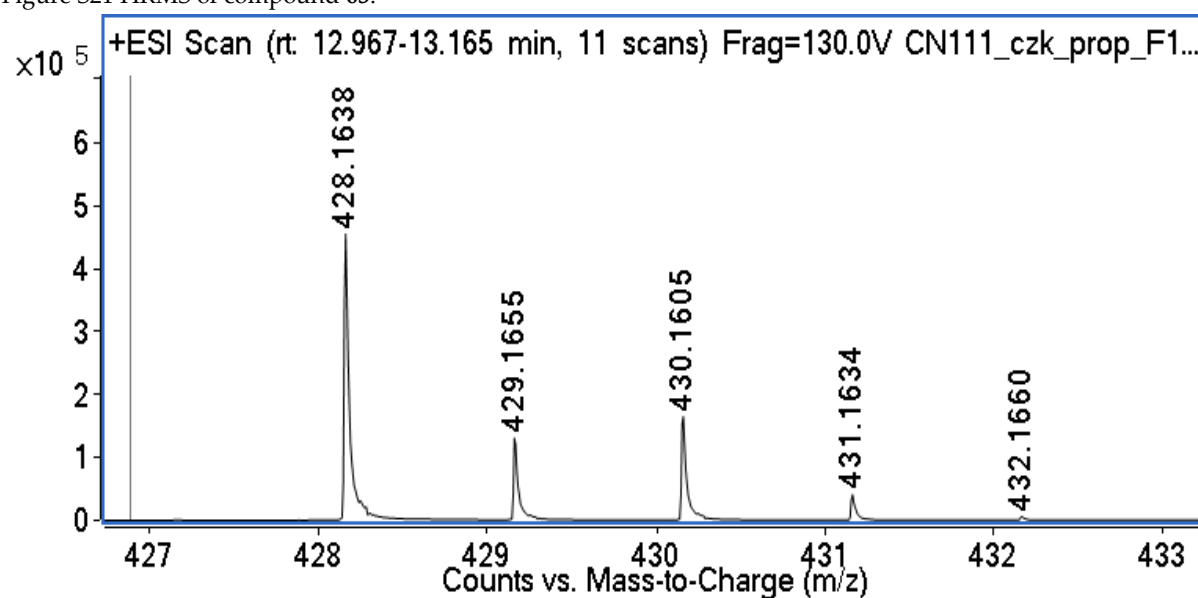

Figure S22:  $^1\text{H}$  NMR spectrum (500 MHz,  $\text{CDCl}_3$ ) of compound **63**.

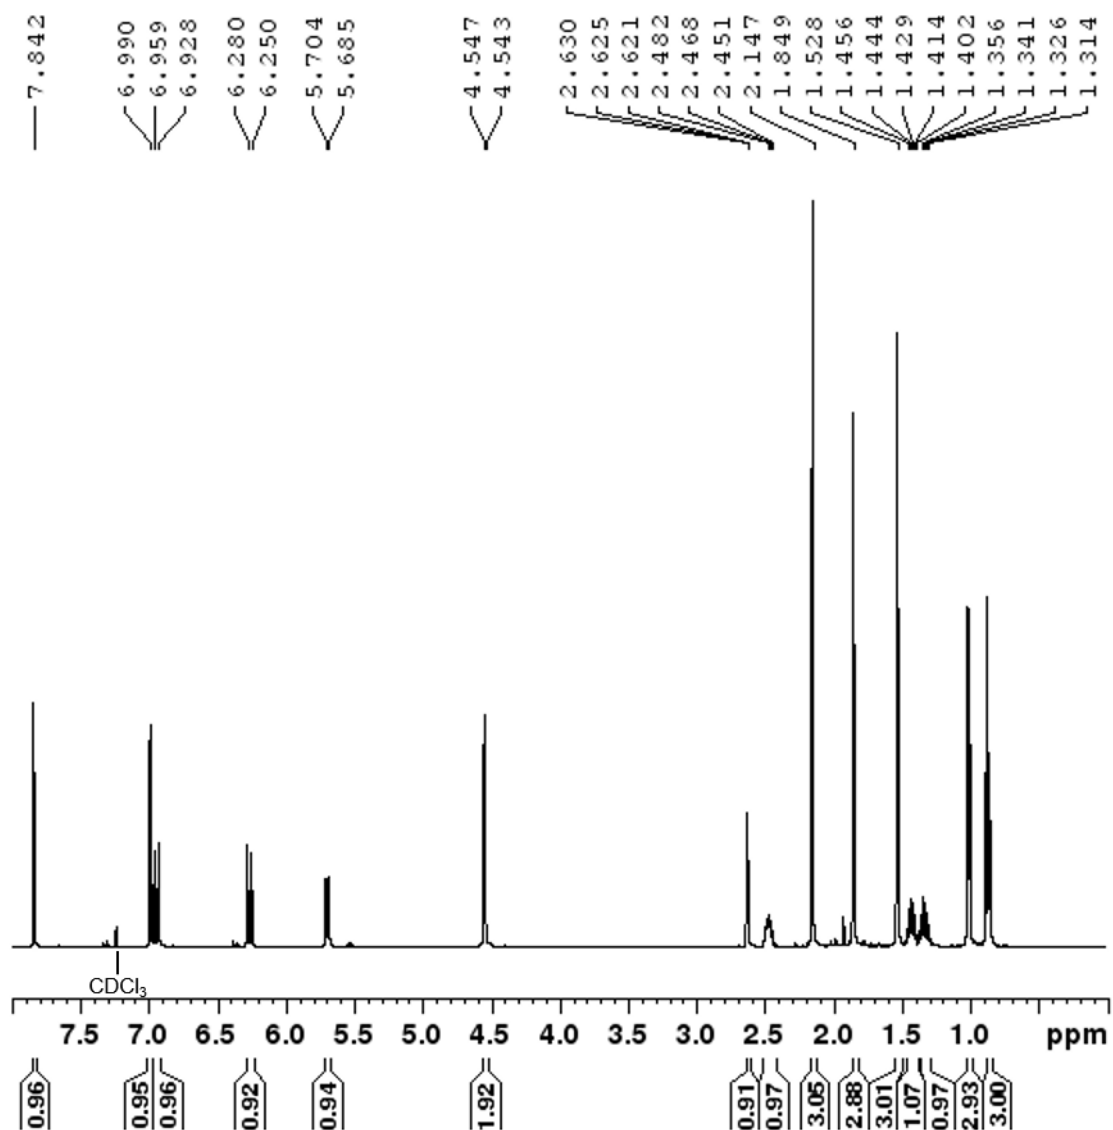

Figure S23:  $^{13}\text{C}$  NMR spectrum (500 MHz,  $\text{CDCl}_3$ ) of compound **63**.

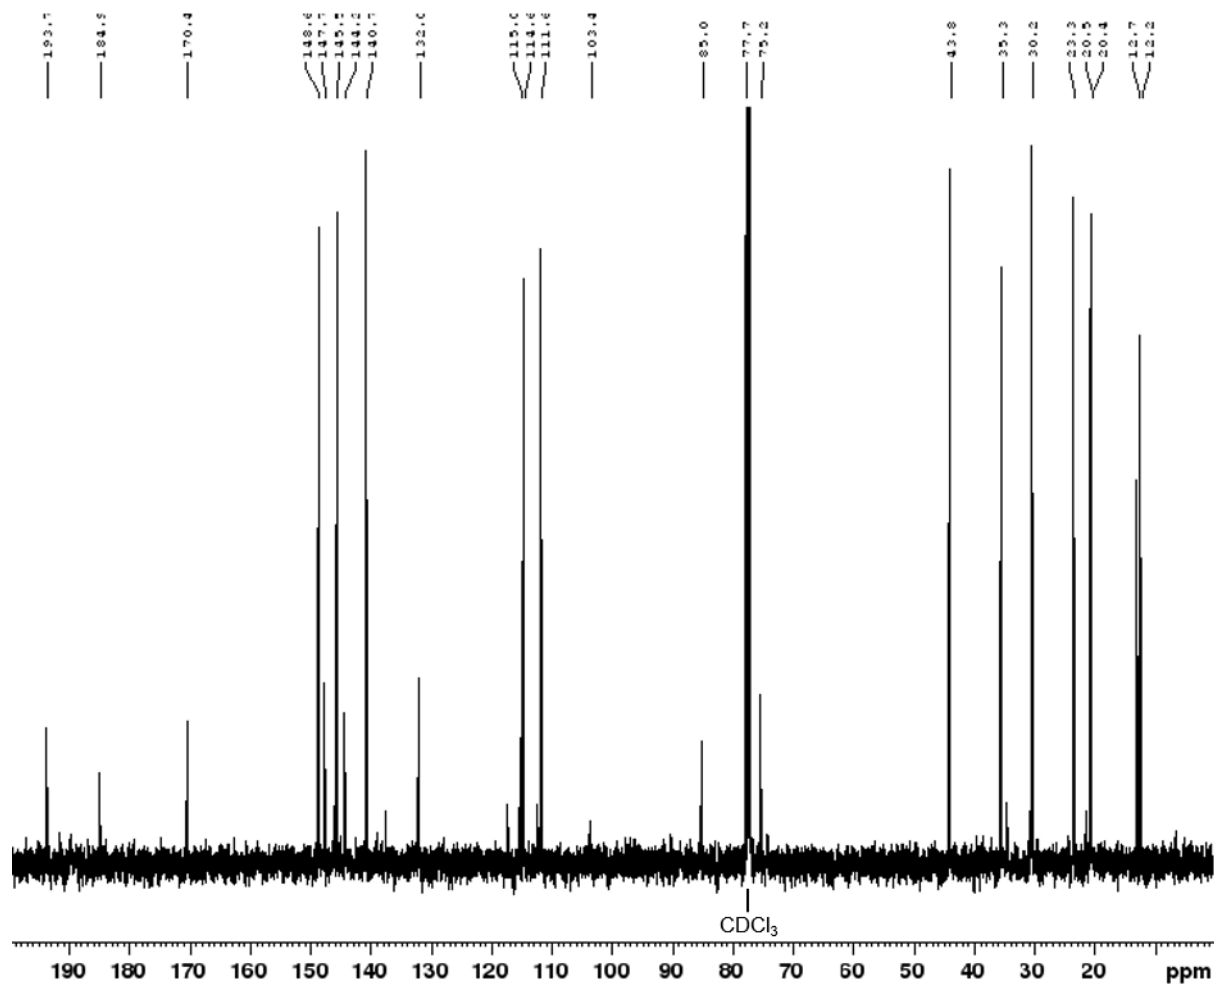

Figure S 24: COSY NMR spectrum (500 MHz, CDCl<sub>3</sub>) of compound **63**.

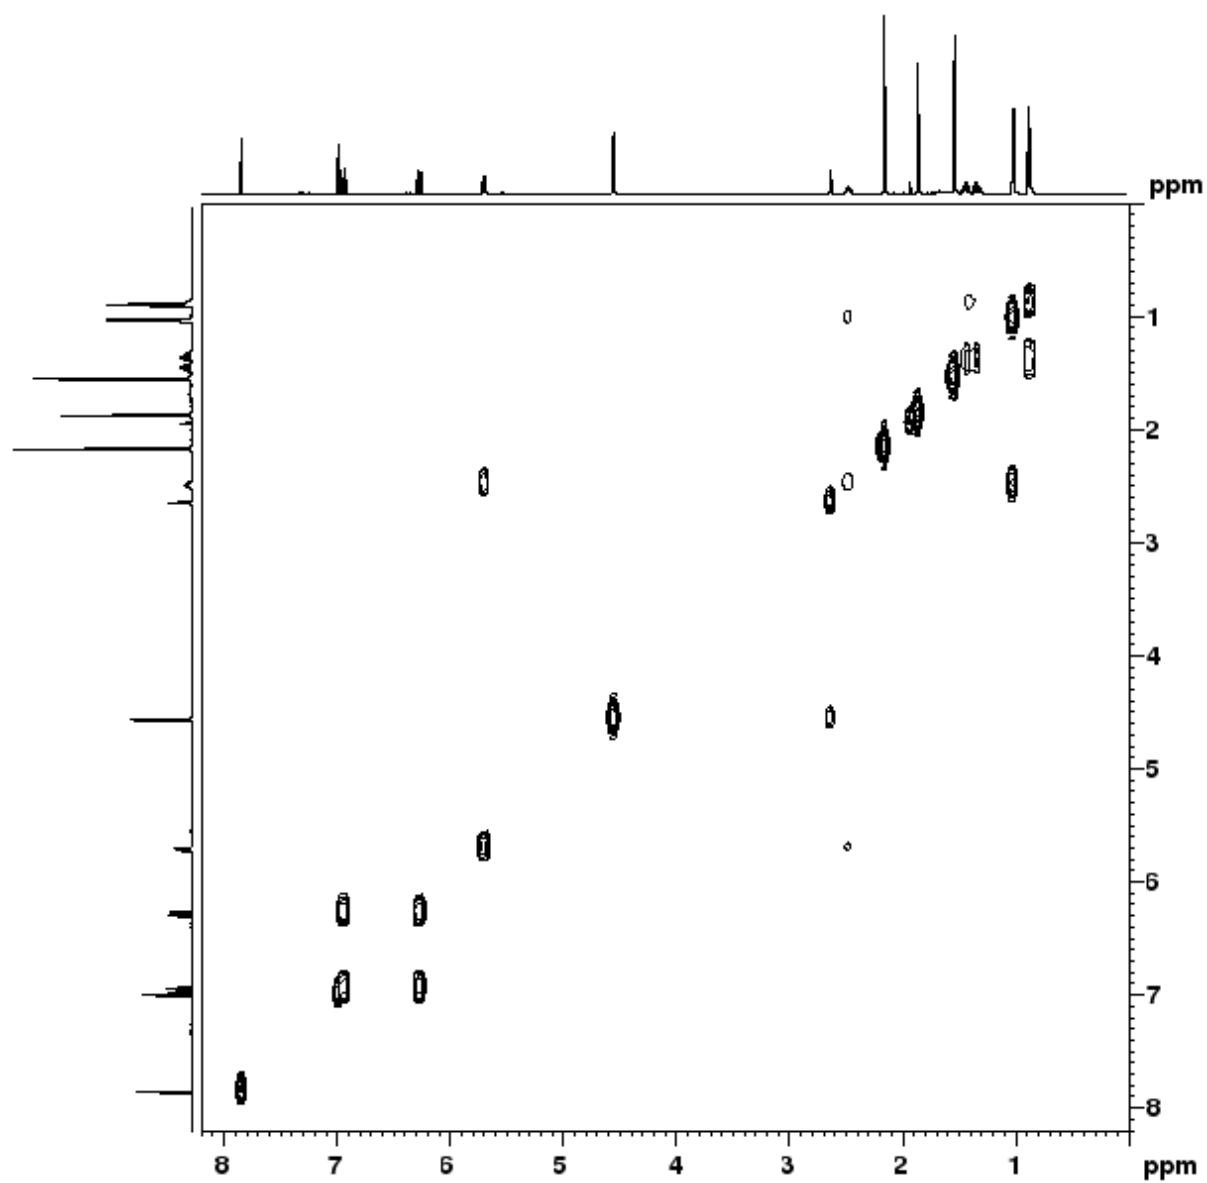

Figure S 25: HSQC NMR spectrum (500 MHz, CDCl<sub>3</sub>) of compound **63**.

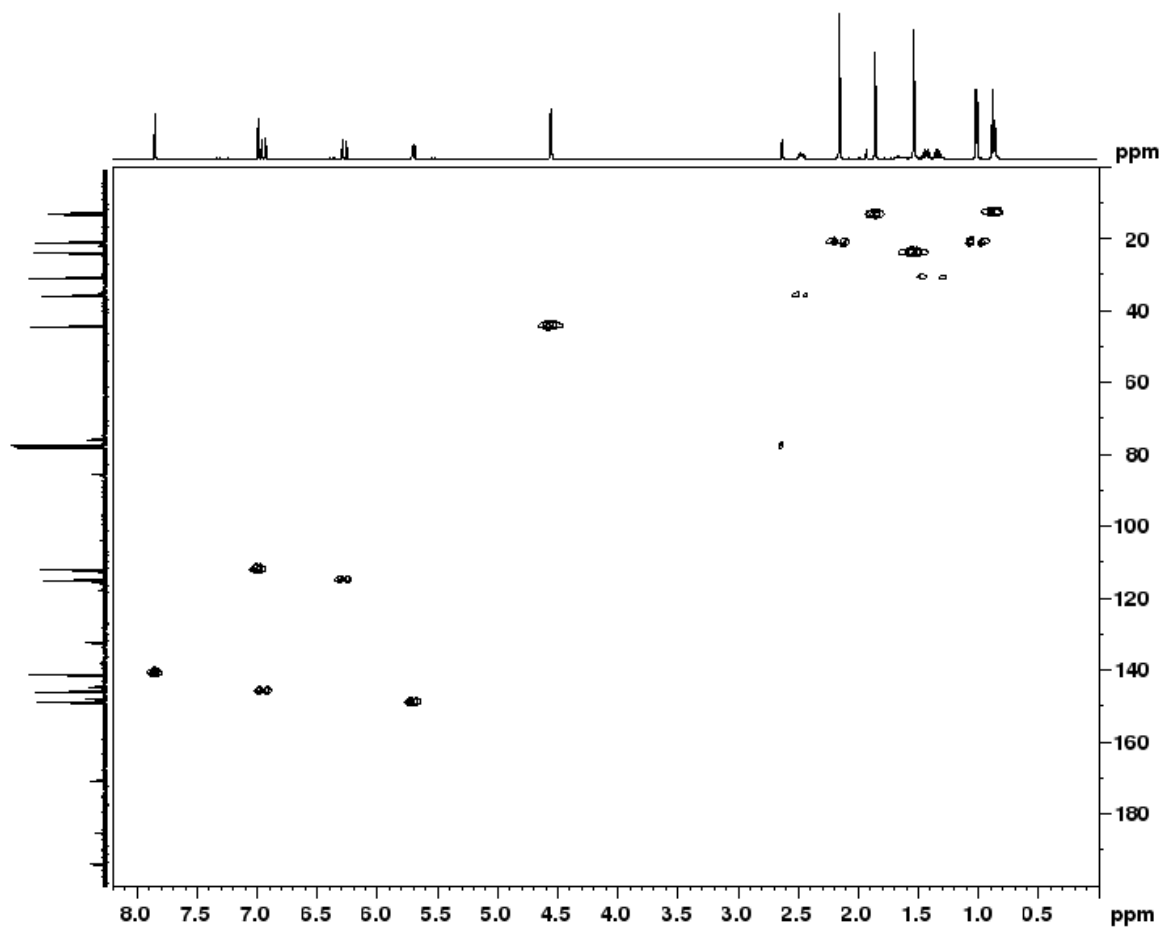

Figure S 26 HMBC NMR spectrum (500, MHz, CDCl<sub>3</sub>) of compound 63.

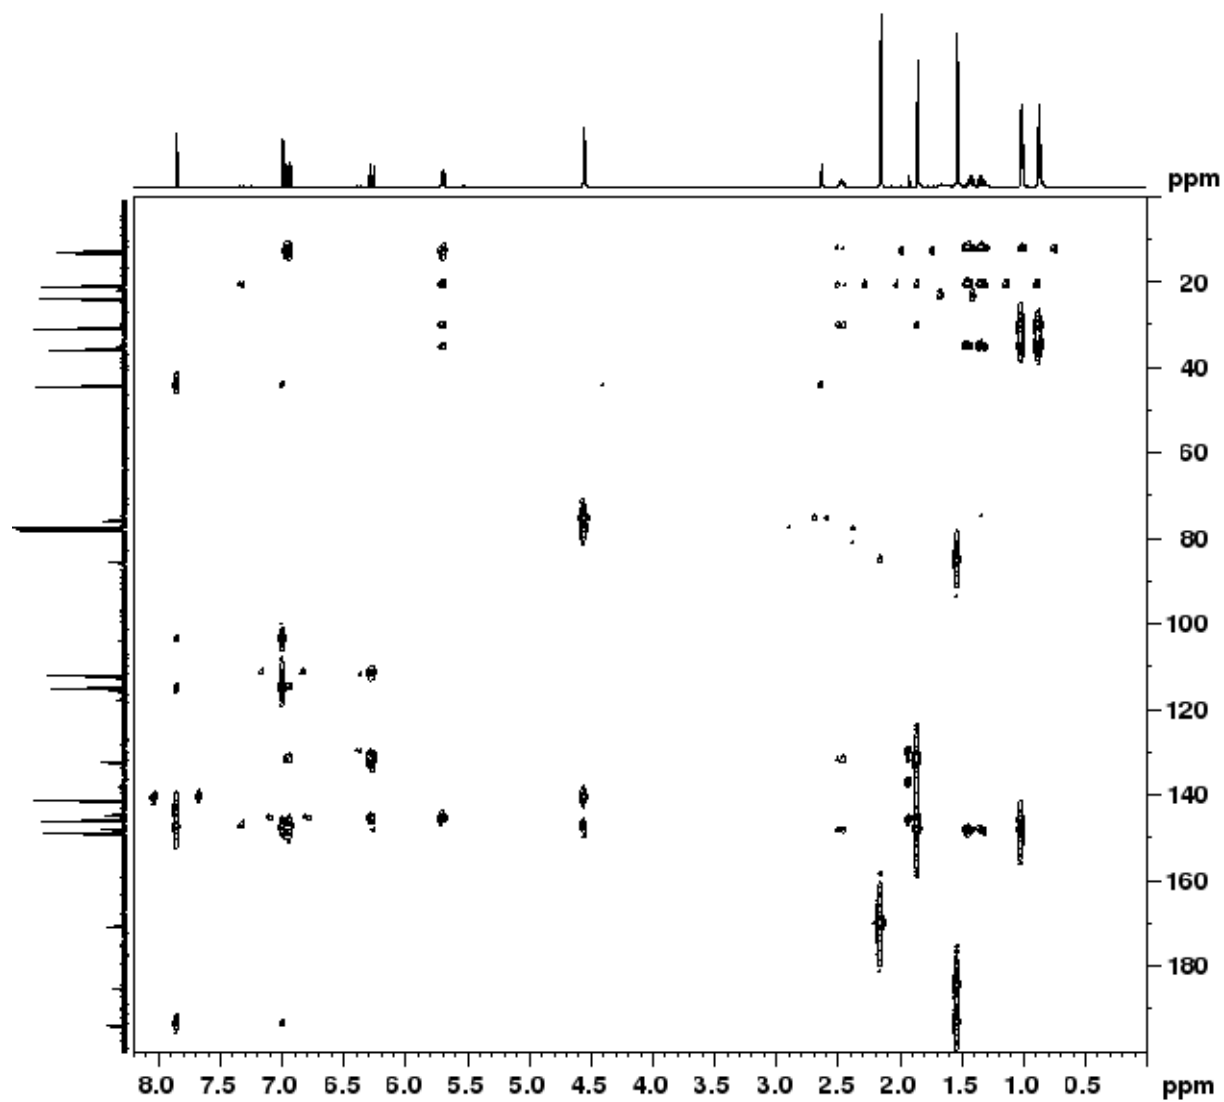



Figure S27: Key  $^1\text{H}$ - $^1\text{H}$  COSY (bold bonds) and  $^1\text{H}$ - $^{13}\text{C}$  (plain arrow) correlations of compound **63**.

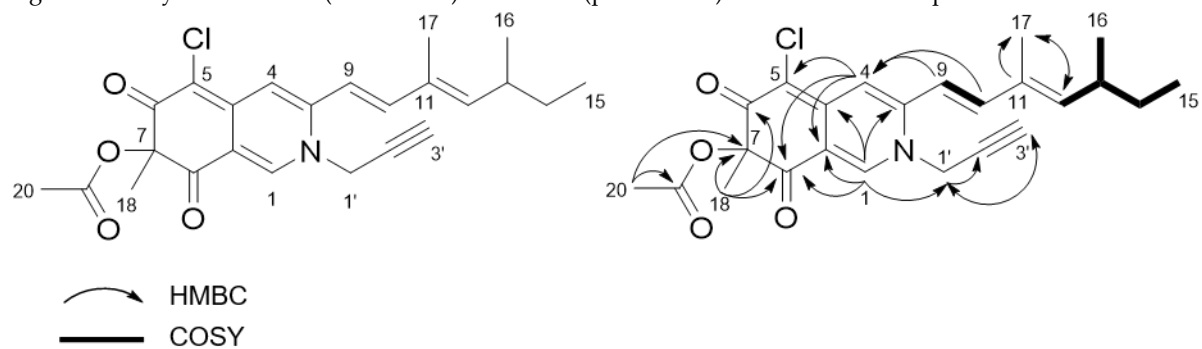

Table S14: <sup>1</sup>H NMR spectroscopic data for compounds **3**, **4**, **39'** and **63** recorded at 500 MHz on CDCl<sub>3</sub>, **24'** recorded at 500 MHz on CD<sub>3</sub>CN and **50'** recorded at 500 MHz on MeOD. Compounds **3** and **4** were described on a previous study.<sup>1</sup>

| Position | $\delta$ H (J in Hz) |               |               |               |               |               |
|----------|----------------------|---------------|---------------|---------------|---------------|---------------|
|          | <b>3</b>             | <b>4</b>      | <b>24'</b>    | <b>39'</b>    | <b>50'</b>    | <b>63</b>     |
| 1        | 7.93, s              | 7.83, s       | 8.03, s       | 7.58, s       | 8.4, s        | 7.84, s       |
| 4        | 6.86, s              | 6.99, s       | 6.85, s       | 7, s          | 6.85, s       | 6.99, s       |
| 9        | 6.13, d(16.1)        | 6.23, d(15.9) | 6.47, d(15.6) | 6, d(15.3)    | 6.46, d(15.4) | 6.26, d(15.2) |
| 10       | 7.04, d(16.7)        | 6.91, d(15.6) | 6.9, d(15.3)  | 6.94, d(15.4) | 6.75, d(15.2) | 6.94, d(15.6) |
| 12       | 5.69, d(9.9)         | 5.68, d(9.9)  | 5.65, d(9.1)  | 5.71, d(10.0) | 5.45, d(8.2)  | 5.70, d(9.7)  |
| 13       | 2.47, m              | 2.47, m       | 2.49, m       | 2.52, m       | 2.40, m       | 2.47, m       |
| 14       | 1.40/1.30, m         | 1.42/1.32, m  | 1.41/1.29, m  | 1.47/1.37     | 1.40/1.30, m  | 1.43/1.33, m  |
| 15       | 0.84, t(7.5)         | 0.86, t(7.5)  | 0.84, m       | 0.91, t(7.4)  | 0.87, t(7.3)  | 0.87, t(7.4)  |
| 16       | 0.99, d(6.6)         | 1.00, d(6.7)  | 0.99, d(6.7)  | 1.05, d(6.9)  | 0.95, d(6.3)  | 1.00, d(6.9)  |
| 17       | 1.83, s              | 1.82, s       | 1.83, s       | 1.84, s       | 1.50, s       | 1.84, s       |
| 18       | 1.57, s              | 1.52, s       | 1.43, s       | 1.55, s       | 1.41, s       | 1.53, s       |
| 20       | 2.16, s              | 2.13, s       | 2.2, s        | 2.19, s       | 2.14, s       | 2.14, s       |
| 1'       |                      | 3.99, m       | 4.69, m       | 4.17/4.01, s  | 3.91, m       | 4.55, d(2.3)  |
| 2'       |                      | 3.91, m       |               | 3.07, m       |               |               |
| 3'       |                      |               | 2.06, m       |               | 3.30, m       | 2.63, t(2.3)  |
| 4'       |                      |               | 1.27, m       | 7.34, d(7.2)  |               |               |
| 5'       |                      |               | 0.84, m       | 7.13, d(7.4), | 5.15, m       |               |
| 6'       |                      |               | 0.84, m       | 7.30, d(7.2)  |               |               |
| 7'       |                      |               |               | 7.13, d(7.4), |               |               |
| 8'       |                      |               |               | 7.34, d(7.2)  | 7.31, d(7.8)  |               |
| 9'       |                      |               |               |               | 7.01, t(7.7)  |               |
| 10'      |                      |               |               |               | 7.08, t(7.1)  |               |
| 11'      |                      |               |               |               | 7.63, d(7.8)  |               |

Table S15: <sup>13</sup>C NMR spectroscopic data for compounds **3**, **4**, **39'** and **63** recorded at 500 MHz on CDCl<sub>3</sub>, **24'** recorded at 700 MHz on CD<sub>3</sub>CN and **50'** recorded at 500 MHz on MeOD. Compounds **3** and **4** were described on a previous study.<sup>1</sup>

| Position | δC, type              |                       |                       |                       |                       |                       |
|----------|-----------------------|-----------------------|-----------------------|-----------------------|-----------------------|-----------------------|
|          | <b>3</b>              | <b>4</b>              | <b>24'</b>            | <b>39'</b>            | <b>50'</b>            | <b>63</b>             |
| 1        | 138.4, CH             | 142.0, CH             | 141.4, CH             | 141, CH               | 138.3, CH             | 140.7, CH             |
| 3        | 146.3, C              | 144.8, C              | 151.8, C              | 144.5, C              | 147.7, C              | 144.2, C              |
| 4        | 110.3, CH             | 111.8, CH             | 112, CH               | 111.8, CH             | 124.9, CH             | 111.7, CH             |
| 4a       | 147.1, C              | 148.5, C              | 145.1, C              | 147.9, C              | 148.4, C              | 147.7, C              |
| 5        | 101.5, C              | 102.2, C              | 100.7, C              | 102.7, C              | 102.1, C              | 103.5, C              |
| 6        | 183.7, C              | 184.4, C              | 184.2, C              | 184.6, C              | 185.4, C              | 184.9, C              |
| 7        | 85.4, C               | 84.9, C               | 86.4, C               | 85.0, C               | 86.5, C               | 85.0, C               |
| 8        | 193.3, C              | 194.0, C              | 194.8, C              | 194, C                | 195.4, C              | 193.7, C              |
| 8a       | 114.2, C              | 114.6, C              | 116.1, C              | 114.8, C              | 117.5, C              | 115.0, C              |
| 9        | 116.4, CH             | 115.1, CH             | 115.1, CH             | 114.8, CH             | 112.7, CH             | 114.6, CH             |
| 10       | 142.9, CH             | 145.1, CH             | 146.1, CH             | 145.1, CH             | 146.0, CH             | 145.6, CH             |
| 11       | 132.0, C              | 131.7, C              | 133.6, C              | 131.7, C              | 133.8, C              | 132.0, C              |
| 12       | 148.7, CH             | 148.0, CH             | 147.2, CH             | 148.2, CH             | 147.7, CH             | 148.6, CH             |
| 13       | 35.1, CH              | 35.0, CH              | 35.5, CH              | 35.2, CH              | 36.2, CH              | 35.3, CH              |
| 14       | 30.6, CH <sub>2</sub> | 30.0, CH <sub>2</sub> | 30.9, CH <sub>2</sub> | 30.2, CH <sub>2</sub> | 31.3, CH <sub>2</sub> | 30.2, CH <sub>2</sub> |
| 15       | 12.0, CH <sub>3</sub> | 12.0, CH <sub>3</sub> | 12.3, CH <sub>3</sub> | 12.2, CH <sub>3</sub> | 12.5, CH <sub>3</sub> | 12.2, CH <sub>3</sub> |
| 16       | 20.1, CH <sub>3</sub> | 20.2, CH <sub>3</sub> | 20.6, CH <sub>3</sub> | 20.5, CH <sub>3</sub> | 20.7, CH <sub>3</sub> | 20.4, CH <sub>3</sub> |
| 17       | 12.4, CH <sub>3</sub> | 12.6, CH <sub>3</sub> | 13.0, CH <sub>3</sub> | 12.8, CH <sub>3</sub> | 12.5, CH <sub>3</sub> | 12.7, CH <sub>3</sub> |
| 18       | 23.6, CH <sub>3</sub> | 23.3, CH <sub>3</sub> | 24.0, CH <sub>3</sub> | 23.4, CH <sub>3</sub> | 24.0, CH <sub>3</sub> | 23.3, CH <sub>3</sub> |
| 19       | 170.9, C              | 170.2, C              | 170.7, C              | 170.2, C              | 171.7, C              | 170.4, C              |
| 20       | 20.6, CH <sub>3</sub> | 20.3, CH <sub>3</sub> | 20.6, CH <sub>3</sub> | 20.5, CH <sub>3</sub> | 20.4, CH <sub>3</sub> | 20.5, CH <sub>3</sub> |
| 1'       |                       | 55.4, CH <sub>2</sub> | 42.7, CH              | 55.6, CH <sub>2</sub> | 56.6, CH              | 43.8, CH <sub>2</sub> |
| 2'       |                       | 60.9, CH <sub>2</sub> | 173.9, C              | 36.8, CH              | 174.1, C              | 75.2, C               |
| 3'       |                       |                       | 30.4, CH <sub>2</sub> | 136, CH               | 28.6, CH <sub>2</sub> | 77.7, CH              |
| 4'       |                       |                       | 25.9, CH              | 128.8, CH             | 109.4, C              |                       |
| 5'       |                       |                       | 22.1, CH <sub>3</sub> | 129.5, CH             | 68.9, CH              |                       |
| 6'       |                       |                       | 23.3, CH <sub>3</sub> | 127.9, CH             |                       |                       |
| 7'       |                       |                       |                       | 129.5, CH             | ND                    |                       |
| 8'       |                       |                       |                       | 128.8, CH             | 112.6, CH             |                       |
| 9'       |                       |                       |                       |                       | 120.6, CH             |                       |
| 10'      |                       |                       |                       |                       | 122.9, CH             |                       |
| 11'      |                       |                       |                       |                       | 119.2, CH             |                       |
| 12'      |                       |                       |                       |                       | 128.3, C              |                       |

ND : not determined

- (1) Hebra, T.; Elie, N.; Poyer, S.; Van Elslande, E.; Touboul, D.; Eparvier, V. Dereplication, Annotation, and Characterization of 74 Potential Antimicrobial Metabolites from *Penicillium sclerotiorum* Using t-SNE Molecular Networks. *Metabolites* **2021**, *11* (7), 444. DOI: [10.3390/metabo11070444](https://doi.org/10.3390/metabo11070444).
- (2) Somoza, A. D.; Lee, K.-H.; Chiang, Y.-M.; Oakley, B. R.; Wang, C. C. C. Reengineering an Azaphilone Biosynthesis Pathway in *Aspergillus Nidulans* To Create Lipoygenase Inhibitors. *Org. Lett.* **2012**, *14* (4), 972–975. DOI: 10.1021/ol203094k.
- (3) Eade, R. A.; Page, H.; Robertson, A.; Turner, K.; Whalley, W. B. 986. The Chemistry of Fungi. Part XXVIII. Sclerotiorin and Its Hydrogenation Products. *J. Chem. Soc.* **1957**, 4913. DOI: 10.1039/jr9570004913.
- (4) Natsume, M.; Takahashi, Y.; Marumo, S. Chlamydospore-like Cell-Inducing Substances of Fungi: Close Correlation between Chemical Reactivity with Methylamine and Biological Activity. *Agric. Biol. Chem.* **1988**, *52* (2), 307–312. DOI: 10.1271/bbb1961.52.307.
- (5) Arai, N.; Shiomi, K.; Tomoda, H.; Tabata, N.; Yang, D. J.; Masuma, R.; Kawakubo, T.; Omura, S. Isochromophilones III -VI, Inhibitors of Acyl-CoA: Cholesterol Acyltransferase Produced by *Penicillium multicolor* FO-3216. *J. Antibiot. (Tokyo)* **1995**, *48* (7), 696–702. DOI: 10.7164/antibiotics.48.696.
- (6) Liu, Z.; Qiu, P.; Liu, H.; Li, J.; Shao, C.; Yan, T.; Cao, W.; She, Z. Identification of Anti-Inflammatory Polyketides from the Coral-Derived Fungus *Penicillium sclerotiorin*: In Vitro Approaches and Molecular-Modeling. *Bioorganic Chem.* **2019**, *88*, 102973. DOI: 10.1016/j.bioorg.2019.102973.
- (7) Seto, H.; Tanabe, M. Utilization of <sup>13</sup>C-<sup>13</sup>C Coupling in Structural and Biosynthetic Studies. III. Ochreophilone - a New Fungal Metabolite. *Tetrahedron Lett.* **1974**, *15* (8), 651–654. DOI: 10.1016/S0040-4039(01)82295-4.
- (8) Matsuzaki, K.; Tahara, H.; Inokoshi, J.; Tanaka, H. New Brominated and Halogen-Less Derivatives and Structure-Activity Relationship of Azaphilones Inhibiting Gp120-CD4 Binding. *J. Antibiot. (Tokyo)* **1998**, *51* (11), 1004–1011. DOI: 10.7164/antibiotics.51.1004.
- (9) Fielding, H. C.; Robertson, A.; Travers, R. B.; Whalley, W. B. 371. The Chemistry of Fungi. Part XXXII. The Oxidation of Sclerotioramine and the Structure of Sclerotiorin. *J. Chem. Soc. Resumed* **1957**, 1814–1824. DOI: 10.1039/JR9580001814.
- (10) Li, J.; Yang, X.; Lin, Y.; Yuan, J.; Lu, Y.; Zhu, X.; Li, J.; Li, M.; Lin, Y.; He, J.; Liu, L. Meroterpenes and Azaphilones from Marine Mangrove Endophytic Fungus *Penicillium* 303. *Fitoterapia* **2014**, *97*, 241–246. DOI: 10.1016/j.fitote.2014.06.011.
- (11) Zhang, L.; Long, Y.; Lei, X.; Xu, J.; Huang, Z.; She, Z.; Lin, Y.; Li, J.; Liu, L. Azaphilones Isolated from an Alga-Derived Fungus *Penicillium* Sp. ZJ-27. *Phytochem. Lett.* **2016**, *18*, 180–186. DOI: 10.1016/j.phytol.2016.10.010.
- (12) Kanehisa, M.; Goto, S. KEGG: Kyoto Encyclopedia of Genes and Genomes. *Nucleic Acids Res.* **2000**, *28* (1), 27–30. DOI: 10.1093/nar/28.1.27.
